# 1 **Chitin perception in plasmodesmata identifies subcellular, context-specific** 2 **immune signalling in plants**

3 Cecilia Cheval<sup>1</sup>, Matthew Johnston<sup>1</sup>, Sebastian Samwald<sup>1</sup>, Xiaokun Liu<sup>1</sup>, Annalisa Bellandi<sup>1</sup>,  
4 Andrew Breakspear<sup>1</sup>, Yasuhiro Kadota<sup>2, 4</sup>, Cyril Zipfel<sup>2, 3</sup> and Christine Faulkner<sup>1\*</sup>

5 <sup>1</sup>John Innes Centre, Norwich Research Park, Colney Lane, Norwich, NR4 7UH, UK

6 <sup>2</sup>The Sainsbury Laboratory, University of East Anglia, Norwich Research Park, Colney  
7 Lane, Norwich, NR4 7UH, UK

8 <sup>3</sup>Present address: Institute of Plant and Microbial Biology, and Zürich-Basel Plant Science  
9 Centre, University of Zürich, Zollikerstrasse 107, CH-8008 Zürich, Switzerland

10 <sup>4</sup>Present address: RIKEN Centre for Sustainable Resource Science, Tsurumi-ku, Yokohama,  
11 230-0045, Japan

12 \*Corresponding author. Email: [christine.faulkner@jic.ac.uk](mailto:christine.faulkner@jic.ac.uk)

13

## 14 **Abstract**

15 The plasma membrane (PM) that lines plasmodesmata has a distinct protein and lipid  
16 composition, underpinning specific regulation of these connections between cells. The  
17 plasmodesmal PM can integrate extracellular signals differently from the cellular PM, but it  
18 is not known how this specificity is established or how a single stimulus can trigger  
19 independent signalling cascades in neighbouring membrane domains. Here we have used the  
20 fungal elicitor chitin to investigate signal integration and responses at the plasmodesmal PM.  
21 We found that the plasmodesmal PM employs a receptor complex composed of the LysM  
22 receptors LYM2 and LYK4 which respectively change their location and interactions in  
23 response to chitin. Downstream, signalling is transmitted via a specific phosphorylation  
24 signature of an NADPH oxidase and localised callose synthesis that causes plasmodesmata  
25 closure. This demonstrates the plasmodesmal PM deploys both plasmodesmata-specific  
26 components and differential activation of PM-common components to independently  
27 integrate an immune signal.

28

## 29 Introduction

30 Plants have an interconnected cytoplasm that bridges neighbouring cells throughout.  
31 Plasma membrane-lined tubes called plasmodesmata (singular plasmodesma) cross the cell  
32 wall and establish cytoplasmic, plasma membrane (PM) and endoplasmic reticulum (ER)  
33 continuity between cells. At a single cell interface there might be thousands of  
34 plasmodesmata (Faulkner *et al.*, 2008; Danila *et al.*, 2018) and as small molecules, proteins  
35 and RNAs can pass from cell-to-cell through plasmodesmata this establishes considerable  
36 capacity for direct molecular exchange between cells and tissues. As almost all cells within  
37 plants are connected via plasmodesmata, they create an extensive conduit through which  
38 signals and resources can be distributed between cells, tissues and organs.

39 The functional aperture of a plasmodesma can change in response to a range of  
40 developmental and environmental signals, generating dynamic zones of connectivity and  
41 molecular exchange that underpin whole organism responses (Rinne *et al.*, 2011; Faulkner *et*  
42 *al.*, 2013; Lim *et al.*, 2016; Rinne, Paul and van der Schoot, 2018). Changes to plasmodesmal  
43 aperture can be executed by the synthesis and hydrolysis of the  $\beta$ -1,3-glucan callose in the  
44 cell wall that surrounds a plasmodesma (Rinne *et al.*, 2011; Vaten *et al.*, 2011; Cui and Lee,  
45 2016). Enzymes responsible for callose turnover are anchored in the plasmodesmal PM and  
46 their activity is likely regulated by actors that similarly reside in the plasmodesmal PM.  
47 Indeed, several plasmodesmata-located proteins have been shown to be critical for  
48 plasmodesmal responses to a range of signals (Benitez-Alfonso *et al.*, 2013; Faulkner *et al.*,  
49 2013; Wang *et al.*, 2013; Cui and Lee, 2016). Further, there are examples of proteins, such as  
50 the Arabidopsis CRINKLY 4 (ACR4) and CLAVATA 1 (CLV1) receptor kinases (RKs), that  
51 are resident in both the PM and the plasmodesmal PM but form plasmodesmata-specific  
52 complexes (Stahl *et al.*, 2013) suggesting that the plasmodesmal PM is a unique signalling  
53 environment.

54 The PM is highly organised into microdomains that are diverse in composition,  
55 function and dynamics. These microdomains regulate the organisation and activation of a  
56 variety of proteins resident within the plasma membrane. In plants and animals, this includes  
57 a variety of cell-surface proteins involved in the perception of environmental and  
58 developmental signals (Malinsky *et al.*, 2013; Ott, 2017; Gronnier *et al.*, 2018). One such  
59 class of cell surface proteins are receptors: RKs and receptor proteins (RPs) display receptor  
60 domains on the outward facing side of the PM and are critical for detecting changes in the  
61 extracellular environment and initiating downstream signalling. Plants have a large repertoire

62 of these PM-anchored receptors and can recognise a large range of molecular signals. Some  
63 RKs and RPs can dynamically form modular receptor complexes in PM microdomains and/or  
64 nanodomains, forming signalling hubs that execute response outputs (Lingwood and Simons,  
65 2010; Bucherl *et al.*, 2017; Ott, 2017). For example, Medicago LysM-CONTAINING  
66 RECEPTOR-LIKE KINASE 3 (LYK3) is dynamically recruited to a PM microdomain  
67 during rhizobia infection (Liang *et al.*, 2018) and the flg22 receptor FLAGELLIN SENSING  
68 2 (FLS2) is stabilised in nanodomains during signalling (Bucherl *et al.*, 2017). The protein  
69 and lipid composition of the plasmodesmal PM differs from other domains of the PM  
70 (Fernandez-Calvino *et al.*, 2011; Grison *et al.*, 2015; Tilsner *et al.*, 2016); the plasmodesmal  
71 PM is rich in sphingolipids (Grison *et al.*, 2015) suggesting it has similarity to PM  
72 microdomains in its lipid composition, further supporting the hypothesis that the  
73 plasmodesmal PM hosts specific signalling cascades similar to PM microdomains.

74 Here we have elucidated the mechanism of plasmodesmal PM specific signalling events  
75 and determined that the plasmodesmal PM functions independently of the neighbouring PM.  
76 By examining the mechanism by which cells perceive and respond to chitin, a fungal cell  
77 wall component that triggers immune responses, we have determined that signalling in the  
78 plasmodesmal PM is distinct from signalling in the PM. We found that in addition to the  
79 plasmodesmata located receptor LysM-CONTAINING GPI-ANCHORED PROTEIN 2  
80 (LYM2) (Faulkner *et al.*, 2013), chitin responses in the plasmodesmal PM require two  
81 additional LysM RKs, LYK4 and LYK5. However, only LYK4 is detected in  
82 plasmodesmata. LYM2 can associate with LYK4 suggesting that chitin-triggered  
83 plasmodesmal responses are mediated by a chitin-activated LYM2-LYK4 complex. The  
84 dependence of plasmodesmal responses on LYK5 appears to rest on LYK5-dependent  
85 modification of LYK4 in the PM prior to chitin perception. Chitin perception by LYM2-  
86 LYK4 triggers BOTRYTIS INDUCED KINASE 1 (BIK1)-independent, calcium-dependent  
87 protein kinase mediated phosphorylation of the NADPH oxidase RESPIRATORY BURST  
88 OXIDASE HOMOLOG PROTEIN D (RBOHD) and ultimately induces callose deposition  
89 and plasmodesmata closure. These findings identify that the plasmodesmal PM integrates  
90 extracellular signals independently and specifically relative to the PM, supporting a model in  
91 which the plasmodesmal PM hosts discrete signalling cascades. Further, the independence of  
92 chitin-triggered plasmodesmal PM responses from those in the PM suggest that cell-to-cell  
93 connectivity is regulated independently of other immune responses. This work demonstrates  
94 that plasmodesmata are regulated independently of other immune responses, suggesting that  
95 there is a critical requirement for a cell to finely tune connectivity to its neighbours.

## 96 **Results**

### 97 *Chitin-triggered plasmodesmata closure is dependent on LYK4 and LYK5*

98 We previously identified that LYM2 is a GPI-anchored, LysM receptor protein that is  
99 resident in the plasmodesmal PM (Faulkner *et al.*, 2013). As LYM2 has no intracellular  
100 domains we reasoned that it must interact with other proteins to initiate downstream signals  
101 that result in plasmodesmal responses. Ligand perception by LysM RKs and RPs often  
102 involves multiple members of the LysM protein family: chitin perception in rice involves  
103 both the RP CHITIN ELICITOR BINDING PROTEIN (OsCEBiP) and the RK CHITIN  
104 ELICITOR RECEPTOR KINASE 1 (OsCERK1) (Kaku *et al.*, 2006; Hayafune *et al.*, 2014);  
105 peptidoglycan perception in Arabidopsis involves the RK CERK1, and RPs LYM1 and  
106 LYM3 (Willmann *et al.*, 2011); and PM chitin perception in Arabidopsis involves CERK1  
107 (also called LYK1) and the RKs LYK4 and LYK5 (Cao *et al.*, 2014). Thus, we hypothesised  
108 that LYM2 might partner with a LysM RK for signalling. The Arabidopsis LysM RK family  
109 consists of 5 members: CERK1/LYK1, LYK2, LYK3, LYK4 and LYK5. To narrow down  
110 plasmodesmata signalling candidates we screened publicly available data sets for LYK gene  
111 expression. Comparing data sets from seedlings (GSE74955, Yamada *et al.*, 2016;  
112 GSE78735, Hillmer *et al.*, 2017) and mature leaves (eFP browser, Winter *et al.* 2007) we  
113 identified variable expression patterns for the *LYK* family members (Fig. S1). Thus, we  
114 performed RT-PCR to identify members of the family expressed in mature Arabidopsis  
115 leaves where we assay for and detect LYM2 function. Only transcripts from *CERK1*, *LYK3*,  
116 *LYK4* and *LYK5* were detected in mature leaves grown in our conditions, eliminating LYK2  
117 from further analysis (Fig. S1). We previously showed that CERK1 is not required for chitin-  
118 triggered plasmodesmata closure (Faulkner *et al.*, 2013) and therefore we assayed for chitin-  
119 triggered plasmodesmal responses in *lyk3*, *lyk4* and *lyk5-2* mutants. Microprojectile  
120 bombardment assays, in which movement of GFP from single transformed cells within the  
121 Arabidopsis leaf epidermis is measured, demonstrated that *lyk3* mutants show a chitin-  
122 triggered reduction in the spread of GFP, indicative of plasmodesmata closure (Fig. 1)  
123 comparable to the wild-type (Col-0) response. By contrast, *lyk4* and *lyk5-2* mutants show no  
124 change in GFP spread following chitin treatment identifying that these mutants cannot close  
125 their plasmodesmata in response to chitin similar to *lym2* mutant plants. Thus, LYK4 and  
126 LYK5 are required for chitin-triggered plasmodesmata closure.

127

128

129 *LYM2-dependent chitin-signalling induces callose deposition at plasmodesmata*

130 Callose is a  $\beta$ -1,3-glucan polymer deposited at plasmodesmata during stages of  
131 development and in response to a range of stresses inducing functional plasmodesmal closure  
132 (Wang *et al.*, 2013; Cui and Lee, 2016; Xu *et al.*, 2017). It is established that reactive oxygen  
133 species (ROS) induce plasmodesmal callose deposition and recently we showed that callose  
134 is deposited at plasmodesmata in response to flg22 (Xu *et al.*, 2017). Therefore, we examined  
135 callose deposition at plasmodesmata in response to chitin in Arabidopsis to determine if this  
136 is common to pathogen-triggered plasmodesmata closure. We quantified aniline blue-stained  
137 plasmodesmata-located callose deposits in chitin-treated and mock-treated leaf tissue of WT  
138 plants and, as for flg22, plasmodesmata-located aniline blue fluorescence increased  
139 significantly within one hour of chitin treatment (Fig. 1B, C). This indicates that callose  
140 deposition at plasmodesmata in response to chitin is an early immune response, likely  
141 triggered within the timeframe of other rapid PAMP-triggered responses such as the ROS  
142 burst and MAPK activation. Aniline blue staining of *lym2-1*, *lyk4* and *lyk5-2* mutant leaves in  
143 the presence of chitin showed that each mutant is unable to deposit callose at plasmodesmata  
144 in response to chitin, confirming that the chitin-triggered reduction in GFP movement  
145 through plasmodesmata is caused by callose deposition. *lym2-1* mutant leaves showed a  
146 reduction in plasmodesmal callose in response to chitin. Like Col-0, *cerk1-2* mutants show an  
147 increase in plasmodesmal callose deposition in response to chitin, consistent with the chitin-  
148 triggered reduction in GFP movement through plasmodesmata by the bombardment assay.

149

150 *LYK4 is present in plasmodesmata*

151 Having identified that LYK4 and LYK5 are required for chitin-triggered  
152 plasmodesmata closure we examined their subcellular localisation to determine if they  
153 accumulate at plasmodesmata like LYM2. We generated translational fusions of LYK4 and  
154 LYK5 to RFP. Both LYK4 and LYK5 localised to the PM in the absence and presence of  
155 chitin, with no enrichment in plasmodesmata evident (Fig. S2). Plasmodesmata are smaller  
156 than the limits of resolution of a confocal microscope and if there is no enrichment of protein  
157 at the plasmodesmata relative to the PM it is difficult to conclude absolutely whether the  
158 protein is present or absent from plasmodesmata. Thus, we performed subcellular  
159 fractionation of plasmodesmata and protein extraction to determine the presence or absence  
160 of LYK4 and LYK5 in plasmodesmal fractions (Fig. 2A). For this we expressed LYK4-HA,  
161 LYK5-HA or the plasmodesmal protein PDL5-HA (Lee *et al.*, 2011) in *N. benthamiana*

162 tissue and purified plasmodesmata. We could detect PDLP5-HA and LYK4-HA, in purified  
163 plasmodesmal extracts, but not LYK5-HA, identifying that only LYK4 co-locates with  
164 LYM2 at plasmodesmata. This suggests that despite the genetic dependence of chitin-  
165 triggered plasmodesmata closure on *LYM2*, *LYK4* and *LYK5*, these three receptors do not  
166 necessarily act co-operatively within plasmodesmata.

167

#### 168 *LYM2 associates with LYK4*

169 The presence of LYM2 and LYK4 in the plasmodesmal PM suggests that they may  
170 form a functional complex that triggers plasmodesmal responses. To test this hypothesis, we  
171 determined if LYM2 associates with LYK4 by targeted co-immunoprecipitation (co-IP)  
172 assays. We co-expressed Citrine-LYM2 with LYK4-HA in *N. benthamiana* and  
173 immunoprecipitated Citrine-LYM2 from membrane fractions with anti-GFP beads (Fig. 2B).  
174 LYK4-HA was co-immunoprecipitated with LYM2 from both water and chitin treated tissue  
175 suggesting that LYM2 associates with LYK4 in a chitin independent manner. The negative  
176 control BRI1-RFP did not co-immunoprecipitate with Citrine-LYM2 (Fig. S3A).

177 Given that LYM2 and LYK4 are present in plasmodesmata we thought that these two  
178 proteins could directly execute plasmodesmal PM chitin signalling. However, LYK5 is also  
179 required for chitin-triggered plasmodesmata closure and thus, we tested the dependence of  
180 the interaction between LYM2 and LYK4 on LYK5. For this we transformed Arabidopsis  
181 *lyk5-2* protoplasts with Citrine-LYM2 and LYK4-RFP (Fig. 2C) and performed targeted co-  
182 IPs. We observed that LYK4-RFP immunoprecipitated with Citrine-LYM2 in a chitin-  
183 independent manner from both Col-0 and *lyk5-2* protoplasts. While this clearly demonstrates  
184 that the interaction between LYM2 and LYK4 is LYK5 independent, these assays also  
185 identified that LYK4-RFP appears approximately 10 kDa smaller on SDS-PAGE gels when  
186 extracted from *lyk5-2* protoplasts, suggesting that LYK4 is modified in a LYK5 dependent  
187 manner. Further, following chitin treatment the dominant LYK4-RFP band detected in *lyk5-2*  
188 protoplasts appears approximately 30kDa smaller than the dominant band in the WT  
189 protoplasts suggesting that the ‘non-modified’ variant of LYK4-RFP in the *lyk5-2* mutant is  
190 subject to degradative processing in response to chitin. Given the genetic dependence of  
191 chitin-triggered plasmodesmata closure on *LYK5*, these observations suggest that  
192 modification of LYK4 mediated by LYK5 is essential for its plasmodesmata-related  
193 signalling function.

194

195 *LYK4 and LYK5 associate in the PM*

196 The observation that LYK5 is required for both chitin-triggered plasmodesmata  
197 closure and modification of LYK4, but is not located at plasmodesmata, suggests a model in  
198 which LYK5 plays a spatio-temporally distinct role in chitin-triggered plasmodesmata  
199 closure. To further investigate we explored the possibility that LYK5 associates with and  
200 modifies LYK4 in the PM, upstream of LYK4 activity at plasmodesmata. Pull-downs of  
201 LYK4-GFP from membrane fractions of *N. benthamiana* tissue expressing both LYK4-GFP  
202 and LYK5-RFP showed that LYK5-RFP co-immunoprecipitates with LYK4-GFP (Fig. 3A).  
203 The negative control BRI1-RFP did not co-immunoprecipitate with LYK4-GFP (Fig. S3B).  
204 This suggests that LYK4 and LYK5 associate in the PM.

205 We further explored the dynamics of this interaction with FLIM-FRET analysis (Fig.  
206 3B). The fluorescence lifetime (average amplitude,  $T_{Av}$ ) of PM-localised LYK4-GFP was  
207 significantly reduced in the presence of LYK5-RFP, indicating an increase in FRET as  
208 expected for interacting proteins. Chitin-treatment decreased the degree of FRET observed  
209 between LYK4-GFP and LYK5-RFP suggesting that chitin weakened the interaction between  
210 LYK4 and LYK5 by either complex dissociation or a change in conformation.

211 We also used FRET-FLIM to investigate the localisation of a LYK4-LYK5 complex  
212 and compare the PM with the plasmodesmal PM (Fig. 3C). For this we marked  
213 plasmodesmata by co-expression of LYK4-GFP and LYK5-RFP with Citrine-LYM2. When  
214 we compared  $T_{Av}$  of LYK4-GFP in regions of interest (ROIs) within the PM and ROIs at  
215 plasmodesmata we observed that in the PM  $T_{Av}$  was significantly reduced by the presence of  
216 LYK5-RFP as expected, but that in plasmodesmata it was not reduced. This supports our  
217 finding that LYK5 is not present in the plasmodesmal PM, and the hypothesis that LYK5 is  
218 critical for LYK4 function upstream of plasmodesmal signalling.

219

220 *LYM2, LYK4 and LYK5 are dynamic in response to chitin*

221 It has been shown that LYK5 undergoes re-localisation in the form of endocytosis in  
222 response chitin (Erwig *et al.*, 2017) and so we explored possible dynamics of LYM2 in  
223 response to chitin. Live-cell imaging of Citrine-LYM2 in *N. benthamiana* leaves suggested  
224 that Citrine-LYM2 fluorescence at plasmodesmata increased in response to chitin treatment  
225 (Fig. 4A); i.e. Citrine-LYM2 at plasmodesmata appeared to get brighter relative to PM

226 fluorescence following chitin treatment. We quantified this response by measuring the  
227 plasmodesmal index (PD index) of fluorescence (plasmodesmata:PM fluorescence intensity  
228 (Perraki *et al.*, 2018) for LYM2 in the absence and presence of chitin (Fig. 4B). The mean PD  
229 index of Citrine-LYM2 in mock treated samples was 1.7 but following 30 min chitin  
230 treatment increased to 2.5, indicating a significant increase in fluorescence intensity at  
231 plasmodesmata in response to chitin. Fluorescence anisotropy measurements of Citrine-  
232 LYM2 in chitin-treated tissue identified lower anisotropy in the plasmodesmata relative to the  
233 PM indicating there is more homo-FRET occurring at plasmodesmata (Fig 4C). The  
234 observation that anisotropy ( $r$ ) of Citrine-LYM2 is lower in the PM relative to freely rotating  
235 cytosolic GFP suggests that homo-FRET occurs in the PM, *i.e.* that LYM2 can interact with  
236 itself in the PM. That  $r$  is further reduced in plasmodesmata suggests that Citrine-LYM2  
237 forms a higher order complex or signalling platform in the plasmodesmal PM.

238 We did not observe any robust change in the distribution of fluorescence of either  
239 LYK4-RFP or LYK5-RFP in response to chitin by live-imaging in *N. benthamiana* leaves  
240 (Fig. S2). However, FRET-FLIM data suggests that LYK4 and LYK5 dissociate in response  
241 to chitin, which could lead to increased lateral mobility of LYK4 and LYK5. To test this, we  
242 performed FRAP analysis of LYK4-RFP and LYK5-RFP in mock and chitin-treated tissue  
243 (Fig. 4D). Following chitin treatment, the mobile fraction of both LYK4 and LYK5 within  
244 the PM increased. Citrine-LYM2 also exhibited a marginal increase in the mobile fraction of  
245 molecules in response to chitin, but only at plasmodesmata. This elevation in the proportion  
246 of the mobile fraction of each receptor in response to chitin suggest dynamic behaviour of  
247 these receptors that changes their interactions and/or the membrane domains in which they  
248 reside.

249

#### 250 *LYM2-dependent chitin-triggered plasmodesmata closure engages unique calcium/ROS* 251 *regulatory modules*

252 Reactive oxygen species (ROS) are produced in immune responses and can induce  
253 plasmodesmata closure (Torres, Dangl and Jones, 2002; Cui and Lee, 2016). Thus, we  
254 hypothesized that ROS play a role in the regulation of plasmodesmata closure in response to  
255 chitin, downstream of LYM2-LYK4 activity. We firstly verified that H<sub>2</sub>O<sub>2</sub> -induced  
256 plasmodesmata closure can be detected by the bombardment method and observed a  
257 reduction of GFP movement from cell-to-cell in WT plants after H<sub>2</sub>O<sub>2</sub> treatment (Fig. S4). In



258 this assay, *lym2-1* mutants were able to close their plasmodesmata in response to H<sub>2</sub>O<sub>2</sub>  
259 demonstrating that any role for ROS signalling in chitin-triggered plasmodesmata closure  
260 occurs independently, or downstream of LYM2 activity. We also further established that  
261 transient expression of LYM2, LYK4 and LYK5 enhanced ROS production in *N.*  
262 *benthamiana* leaf discs following chitin treatment, suggesting that each of these LysM  
263 proteins can mediate ROS signalling.

264 The rapid production of ROS in response to chitin is associated with the NADPH  
265 oxidase RBOHD (Kadota *et al.*, 2014) and so we tested whether RBOHD is required for  
266 chitin-triggered plasmodesmata closure. Bombardment assays showed that the *rboh*d mutant  
267 is not able to close its plasmodesmata in response to chitin treatment (Fig. 5A). This was  
268 supported by quantitative analysis of plasmodesmal callose that showed that *rboh*d mutants  
269 did not deposit callose at plasmodesmata in response to chitin (Fig. S5). Thus, ROS produced  
270 by RBOHD are a critical component of the chitin-triggered signalling cascade that induces  
271 plasmodesmata closure.

272 In Arabidopsis, RBOHD is regulated by phosphorylation by protein kinases (Dubiella  
273 *et al.*, 2013; Kadota *et al.*, 2014, 2018; Li *et al.*, 2014). It has been shown that the receptor-  
274 like cytoplasmic kinase (RLCK) BIK1 and calcium dependent protein kinases (CPKs) both  
275 phosphorylate RBOHD in response to chitin: BIK1 phosphorylates Ser39, Ser339, Ser343  
276 and Ser347, while CPKs phosphorylate Ser133, Ser148, Ser163 and Ser347 (Dubiella *et al.*,  
277 2013; Kadota *et al.*, 2014). To test dependence of plasmodesmal responses on BIK1, we  
278 assayed *bik1* mutant plants for chitin-triggered plasmodesmata closure and observed that *bik1*  
279 mutants exhibited a wild-type response to chitin. Thus, BIK1 does not function in this process  
280 (Fig. 5A). Given the large number of members in the RLCK and CPK families that function  
281 in immune responses we focused our attention on the contribution of phosphorylated residues  
282 of RBOHD to chitin-triggered plasmodesmal responses. For this we tested a range of  
283 phospho-null mutant variants (mutation of serine to alanine) of RBOHD in the *rboh*d mutant  
284 background: RBOHD<sub>S39A/S339A/S343A</sub>, RBOHD<sub>S343A/S347A</sub>, RBOHD<sub>S133A</sub>, and RBOHD<sub>S163A</sub>  
285 (Fig. 5A). Consistent with our results for the *bik1* mutant, RBOHD<sub>S39A/S339A/S343A</sub>, in which  
286 serines phosphorylated by BIK1 are mutated, showed a wild-type response and can close  
287 their plasmodesmata in response to chitin. Examining variants in which mutated  
288 phosphosites are targeted by CPKs, RBOHD<sub>S343A/S347A</sub> and RBOHD<sub>S133A</sub> were unable to close  
289 their plasmodesmata in response to chitin while RBOHD<sub>S163A</sub> showed a wild-type response,  
290 identifying that phosphorylation of S347 and S133 are required for chitin-triggered  
291 plasmodesmata closure. Thus, unlike the CERK1-mediated ROS burst at the PM (Miya *et al.*,

292 2007; Rao *et al.*, 2018), chitin-triggered plasmodesmata closure is independent of BIK1 and  
293 instead dependent on CPK mediated phosphorylation of RBOHD.

294 Among the CPKs, CPK4, 5, 6 and 11 have been described to be involved in the  
295 regulation of RBOHD-dependent ROS burst, and CPK6 has been shown to phosphorylate  
296 both Ser133 and S347 (Kadota *et al.*, 2014). Therefore, we tested the involvement of CPK6  
297 in chitin-triggered plasmodesmata closure. Bombardment assays showed that two  
298 independent *cpk6* mutants, *cpk6-1* and *cpk6-2*, were unable to close their plasmodesmata in  
299 response to chitin (Fig. 5A) confirming CPK6 functions in plasmodesmal signalling.

300 LYM2 is a GPI anchored protein and therefore unlikely to directly interact with  
301 intracellular CPKs. Having shown previously that LYM2 associates with LYK4 (Fig 2), we  
302 investigated the interaction between CPK6 and LYK4. We generated a GFP-tagged  
303 translational fusion of CPK6 (CPK6-GFP) that we transiently expressed in *N. benthamiana*  
304 leaf tissue with LYK4-HA. Co-IP experiments show that CPK6-GFP and LYK4-HA  
305 associate (Fig 5B). These data suggest that a LYM2-LYK4 complex recruits CPK6 for  
306 phosphorylation of RBOHD and thereby executes plasmodesmal signalling.

307

## 308 **Discussion**

309 The innate immune system depends on the perception of pathogen molecules by  
310 extracellular and intracellular receptors. Here, we have characterised how a plant cell can  
311 perceive and initiate immune responses to a single ligand in different domains of the PM. Our  
312 data has identified that while fungal chitin is perceived and triggers signalling via a CERK1-  
313 dependent cascade in the PM, in the plasmodesmal PM chitin triggers a LYM2/LYK4-  
314 dependent cascade to produce a specific, localised response. Thus, for chitin signalling in  
315 plant cells both receptors and signalling cascades can show specificity to a given subcellular  
316 context.

317 Subcellular specificity in ligand perception by receptors and signalling have both been  
318 documented in animal cells. It is known that the same ligand can be perceived by different  
319 receptors in different subcellular compartments, allowing detection of a ligand in different  
320 cellular locations, e.g. the flg22 peptide can be perceived extracellularly by the membrane  
321 anchored Toll-Like Receptor 5 (TLR5) (Hayashi *et al.*, 2001) and in the cytosol by the  
322 soluble NLR Family CARD Domain Containing 4 (NLRC4) (Kofoed and Vance, 2011; Zhao  
323 *et al.*, 2011). Alternatively, subcellular specificity can be conveyed at the response level, e.g.  
324 the lipopolysaccharide (LPS) receptor TLR4 triggers signalling from the PM but is also

325 endocytosed and subsequently initiates a secondary signalling cascade from endosomes  
326 (Płóciennikowska *et al.*, 2015). Our findings here show that plant cells can combine both  
327 receptor and signalling specialisation to fully integrate the perception of a signal into an  
328 immune response. Further, specialisation and independence of signalling at the plasmodesmal  
329 PM suggests that cell-to-cell connectivity must be regulated independently of other immune  
330 outputs, raising questions regarding whether there is a critical requirement for cells to balance  
331 communication and exchange with the protective mechanism imposed by isolation.

332 Our investigation in to the mechanisms by which chitin signalling is executed at the  
333 plasmodesmal PM identified that the plasmodesmata-resident GPI-anchored protein LYM2  
334 accumulates at plasmodesmata in response to chitin. LYM2 also exhibits greater homo-FRET  
335 in the plasmodesmal PM than in the PM suggesting it oligomerises or clusters to form a  
336 signalling platform. It is well established that many forms of immune signalling occur via the  
337 formation of supramolecular complexes such as signalosomes and inflammasomes that  
338 involve the oligomerisation of cytosolic NLR receptors and downstream signalling  
339 components. Membrane anchored receptors also form multi-component signalling complexes  
340 (Mueller and Nickel, 2012; Stegmann *et al.*, 2017; Ren *et al.*, 2019) and in some cases higher  
341 order clusters (Scott *et al.*, 2008; Pan *et al.*, 2019) for signalling. The CYSTEINE-RICH  
342 RECEPTOR-LIKE KINASE2 (CRK2) was recently shown to accumulate at the  
343 plasmodesmal PM in response to salt stress (Hunter *et al.*, 2019) suggesting the possibility  
344 that the plasmodesmal PM commonly executes signalling via transient recruitment and  
345 concentration of machinery.

346 We found that in addition to LYM2, the RK LYK4 is also critical for plasmodesmal  
347 PM chitin signalling. LYK4 associates with LYM2 and is detected in plasmodesmata but  
348 does not accumulate at plasmodesmata in response to chitin. LYK4 associates with the RK  
349 LYK5 in the PM but in response to chitin treatment we observed that the mobile fraction of  
350 LYK4 increased and the association between LYK4 and LYK5 in the PM decreased. When  
351 membrane proteins change their associations, they frequently exhibit a change in their  
352 biophysical properties and/or behaviour and therefore our data suggests that chitin triggers  
353 dissociation between these two RKs and releases a pool of LYK4 for signalling at  
354 plasmodesmata. It has been reported that the mobility of receptors both increases (Wang *et al.*,  
355 2015) and decreases (Bucherl *et al.*, 2017) in response to ligand binding, but given that  
356 signalling complexes are larger multi-component structures, it is likely that activated  
357 receptors in complexes are less mobile. Our observations of an increased mobile fraction in

358 response to the presence of chitin might result from the complex dynamics and changes in  
359 association that are evident for the LysM receptor family and represent the disassociated  
360 fraction of the RK pool. It might also be that LysM receptors and their signalling complexes  
361 behave differently from the LRR receptors that have been the focus of previous studies.

362 In addition to LYM2 and LYK4 we identified that LYK5 is a critical component of  
363 chitin-triggered plasmodesmal responses. However, LYK5 was not detected in purified  
364 plasmodesmata. This suggested to us that the dependence of chitin-triggered plasmodesmata  
365 closure on LYK5 is due to activity and association with LYK4 in the PM, upstream of  
366 plasmodesmal signalling responses. Targeted co-IP of LYM2 and LYK4 from *lyk5-2*  
367 protoplasts identified that LYK4 was smaller in the absence of LYK5 and undergoes  
368 enhanced degradative processing in response to chitin. It is known that LysM receptors are  
369 subject to ectodomain cleavage (Petutschnig *et al.*, 2014), which might explain the chitin-  
370 triggered degradation of LYK4. However, the smaller form of LYK4 detected in *lyk5-2*  
371 protoplasts is more consistent with a post-translational modification such as mono-  
372 ubiquitination or sumoylation. Indeed, LYK5 has been shown to interact with the E3  
373 ubiquitin ligase PLANT U-BOX13 (Liao *et al.*, 2017) suggesting ubiquitination is a likely  
374 candidate modification. Thus, we propose that LYK5 is required for post-translational  
375 modification of LYK4 so that it can execute plasmodesmal responses.

376 LYK4 is predicted to be an inactive kinase (Wan *et al.*, 2012), suggesting that it needs  
377 further interacting partners to mediate signalling. Here, we have shown LYK4 can associate  
378 with CPK6, which is known to phosphorylate Ser133 and Ser347 of RBOHD (Kadota *et al.*,  
379 2014) and is critical for chitin-triggered plasmodesmata closure. Thus, CPK6 could transmit a  
380 signal from LYK4 to RBOHD in the plasmodesmal PM. In this scenario, LYK4 has  
381 characteristics of a scaffold protein that modulates signalling complex formation: LYK4  
382 bridges the apoplastic plasmodesmal-specificity defined by LYM2 with an intracellular  
383 signalling kinase. This has some similarity to the activity described recently for the malectin-  
384 like receptor kinase FERONIA (FER) (Stegmann *et al.*, 2017) and the N-myristoylated  
385 protein BRASSINOSTEROID SIGNALING KINASE 3 (BSK3) (Ren *et al.*, 2019) in the  
386 formation of receptor signalling complexes for EF-Tu and flg22, and brassinosteroids  
387 respectively.

388 Current models for phosphorylation and activation of RBOHD have suggested that  
389 RLCKs and CPKs are involved in a two-step regulation of RBOHD activity in which RLCKs  
390 prime RBOHD for activation by CPK phosphorylation (Kadota *et al.*, 2014). This idea allows  
391 for finely tuned control of the production of ROS. In our study, chitin-triggered

392 plasmodesmata closure is independent of BIK1, one of the RLCK family members required  
393 for the CERK1 associated chitin-triggered ROS burst (Rao *et al.*, 2018). Chitin-triggered  
394 plasmodesmata closure is unlikely to depend on other RLCKs as the response is also  
395 independent of phosphorylation of Ser39, Ser339 and Ser343 which are targeted by the  
396 RLCK BIK1 and essential for the CERK1 associated chitin-triggered ROS burst (Kadota *et*  
397 *al.*, 2014). Thus, our data suggests that for chitin-triggered plasmodesmata closure, RBOHD  
398 activity might be controlled by different regulatory modules. It is unclear what information  
399 specific activation of RBOHD conveys in independent signalling pathways to a single ligand.

400 We observed that chitin-triggered plasmodesmata closure is dependent on both CPK-  
401 targeted phosphosites within RBOHD, and CPK6. However, not all CPK targeted  
402 phosphosites of RBOHD we tested were critical for plasmodesmal responses. Mutation of  
403 Ser163 did not abolish chitin-triggered plasmodesmata closure while mutations in Ser133 and  
404 Ser347 did, implying there is response-associated specificity within CPK-mediated  
405 phosphorylation of RBOHD. A possible explanation lies in CPK phosphorylation motifs  
406 (Kadota *et al.*, 2014): Ser133 and Ser347 are categorised as motif 1 sites ([B-B-X-B]- $\phi$ -X-X-  
407 X-X-S/T-X-B) while Ser163 is categorised as a motif 2 site ( $\phi$ -X-B-X-X-S-X-X-X- $\phi$ ) linking  
408 chitin-triggered plasmodesmata closure to motif 1 sites. The significance of these motifs and  
409 their relevance to plasmodesmal signalling is unknown; they may correlate to specific CPKs,  
410 or to an independent mechanism for tuning RBOHD activity.

411 Combining all the measurements and observations we have made in this study, we  
412 propose a model for plasmodesmal PM specific signal integration during chitin immune  
413 responses (Fig. 6). We suggest that LYK4 and LYK5 constitutively interact at the PM and  
414 that this mediates function-critical modification of LYK4. Chitin perception triggers  
415 dissociation of the LYK4-LYK5 complex, allowing for an increased interaction between  
416 LYK4 and LYM2, and LYM2 accumulation at plasmodesmata. At the plasmodesmal PM,  
417 LYM2 establishes a signalling platform that recruits LYK4, and by association CPK6, to this  
418 membrane microdomain. CPK6 phosphorylates RBOHD to produce ROS and induce  
419 localised callose synthesis and plasmodesmata closure within an hour of the initial perception  
420 of chitin.

421 This model is distinct from that for chitin perception in the PM in which a CERK1-  
422 LYK5 complex forms in response to chitin and triggers BIK1-dependent phosphorylation of  
423 RBOHD. Both the plasmodesmal PM and PM chitin-triggered signalling cascades activate  
424 RBOHD, but our analyses identified that CERK1 and LYM2 signalling function  
425 independently (Faulkner *et al.*, 2013). It is significant that while both chitin responses

426 activate RBOHD there is no evidence of cross-talk between the ROS produced by CERK1  
427 and LYM2. This independence suggests either that ROS signalling is highly localised.  
428 Alternatively, it is possible that the apoplastic environment surrounding the plasmodesmata  
429 insulates the plasmodesmal PM from external signals, but the observation that exogenously  
430 applied hydrogen peroxide can induce plasmodesmal responses (Fig. S5; Cui and Lee, 2016)  
431 suggests this is unlikely to fully explain the signalling localisation.

432 We have demonstrated that the plasmodesmal PM integrates signals independently of  
433 the PM and that plant cells are thus capable of exploiting receptor and signalling specificity  
434 to mediate localised and specialised responses. In the context of immune responses, this  
435 identifies that cells regulate cell-to-cell connectivity independently of other immune outputs.  
436 This work establishes that cell-to-cell connectivity and molecular exchange is a key  
437 component of how plant tissues respond to pathogen signals. Given that plasmodesmata are  
438 regulated in response to a range of abiotic and developmental signals it seems likely that the  
439 ability of a cell to independently regulate its plasmodesmata occurs in a variety of contexts  
440 and is a fundamental component of how tissues and organs respond as multicellular entities.

441

442

443

444

## 445 **Material and methods**

### 446 **Plant materials**

447 *Arabidopsis* plants were grown on soil in short days conditions with 10h light at 22 °C. *N.*  
448 *benthamiana* plants were grown on soil with 16h light at 23 °C. *Arabidopsis* Columbia-0  
449 (Col-0) was used as wild-type plants. The mutant lines used in this study are: *rboh*d (Torres,  
450 Dangl and Jones, 2002), *lym2-1* (SAIL\_343\_B03, (Faulkner *et al.*, 2013)), *cerk1-2-*  
451 (GABI\_096F09, (Miya *et al.*, 2007)), *lyk3* (SALK\_140374 (Wan *et al.*, 2012)), *lyk4*  
452 (WiscDsLox297300\_01C (Wan *et al.*, 2012)), *lyk5-2* (SALK\_131911.31.20.x (Cao *et al.*,  
453 2014)), *bik1* (Salk\_005291C (Veronese *et al.*, 2006)), *cpk6-1* (SALK\_093308) and *cpk6-2*  
454 (SALK\_033392) (Mori *et al.*, 2006). RBOHD variants RBOHD<sub>S339A/S343A</sub> and  
455 RBOHD<sub>S39A/S339A/S343A</sub> are mutant variants of RBOHD transformed in to the *rboh*d mutant  
456 background as described (Kadota *et al.*, 2014). The RBOHD variants RBOHD<sub>S133A</sub> and  
457 RBOHD<sub>S163A</sub> were generated by complementation of the *Arabidopsis* *rboh*d mutant with  
458 constructs harbouring site specific mutations.

### 459 **DNA Constructs**

460 Citrine-LYM2 is as previously described (Faulkner *et al.*, 2013). LYK4 and LYK5 coding  
461 sequences were PCR amplified from Col-0 cDNA and cloned into pDONR by Gateway BP  
462 reactions (Invitrogen). Entry Clones carrying LYK4 and LYK5 were verified by sequencing.  
463 To generate Cauliflower Mosaic Virus (CaMV) 35S promoter-driven LYK4 and LYK5  
464 constructs C-terminally-tagged with GFP, RFP, HA or myc, pENTR clones were recombined  
465 by the Gateway LR reaction with pB7FWG2.0, pB7RWG2.0, pGWB14 and pGWB17  
466 respectively. CPK6 was PCR cloned from Col-0 cDNA using gene-specific primers with  
467 Golden Gate compatible extensions (BpiI recognition sequences and fusion sites) and cloned  
468 into the universal acceptor plasmid pUAP1 by digestion/ligation using BpII. Clones were  
469 validated by sequencing. Level 1 binary constructs were assembled in the pICH47751 vector  
470 with the following modules by digestion/ligation using BsaI: pUAP1 carrying CPK6;  
471 pICH51277 carrying CaMV 35S, pICSL50008 carrying GFP for C-terminal fusion,  
472 pICH41414 carrying CaMV 35S terminator. The BRI1-RFP fusion is as described (Bucherl  
473 *et al.*, 2017). For generation of RBOHD<sub>S133A</sub> and RBOHD<sub>S163A</sub> we used site-directed  
474 mutagenesis: DNA fragments were amplified by PCR using primers harbouring mutation  
475 from pBIN19g.pRbohD:3xFLAG-gRBOHD (Kadota *et al.*, 2014) and the mutated fragments  
476 were cloned between EcoRI and BamHI sites of pBin19g vector by using In-fusion enzyme.

## 477 **Transient expression in *Nicotiana benthamiana***

478 *Agrobacterium tumefaciens* GV3101 carrying the desired construct was cultured overnight  
479 and resuspended in MMA buffer containing 0.01M 2-(N-morpholino)ethanesulfonic acid  
480 (MES) pH 5.6, 0.01M MgCl<sub>2</sub>, 0.01M acetosyringone. Each *Agrobacterium* strain carrying the  
481 desired construct was mixed with an *Agrobacterium* strain carrying the P19 silencing  
482 suppressor. Each strain was adjusted to a final optical density of 0.2 at 600 nm and syringe-  
483 infiltrated into leaves of 4-week-old *Nicotiana benthamiana* plants. Material for experiments  
484 was harvested two days post-infiltration.

## 485 **Semi-quantitative RT-PCR analysis**

486 RNA was extracted from leaves of 5-week-old *Arabidopsis* plants using RNeasy Mini  
487 extraction kit (Qiagen) and treated with Turbo DNA-free kit (Ambion) before cDNA  
488 synthesis using Reverse Transcriptase (Promega) according to the manufacturer's  
489 instructions. Semi-quantitative RT-PCR was performed on the cDNA samples with primers  
490 listed in Table S2.

## 491 **Microprojectile bombardment assays**

492 Microprojectile bombardment assays were performed as described (Faulkner *et al.*, 2013). 5-  
493 to 6-week-old expanded leaves of *Arabidopsis* plants were bombarded with 1nm gold  
494 particles (BioRad) coated with pB7WG2.0-GFP and pB7WG2.0-RFP<sub>ER</sub>, using a Biolistic  
495 PDS-1000/He particle delivery system (BioRad). The gold particles were prepared by  
496 precipitating 5 µg of each DNA plasmid construct on to the gold particles with 625mM CaCl<sub>2</sub>  
497 (Sigma) and 10mM spermidine (Sigma). Bombarded leaves were infiltrated with 500 µg/mL  
498 chitin (mixture of chitin oligosaccharides, NaCoSy) or water 2 hours post bombardment.  
499 Bombardment sites were assessed 16 hours after bombardment by confocal (Leica SP5 or  
500 SP8) or epifluorescence microscopy (Leica DM6000) with a 25× water dipping objective  
501 (HCX IRAPO 25.0× 0.95 water). The number of cells showing GFP was counted for each  
502 bombardment site (marked by RFP<sub>ER</sub>). For each treatment, data were collected from at least 3  
503 independent experiments, each of which consisted of leaves from at least three individual  
504 plants. The normality of each data set was assessed by a Shapiro-Wilk test. When normally  
505 distributed a Student's t-test was applied and when the data was not normally distributed a  
506 non-parametric Mann-Whitney U test was used. Statistical significance was concluded when  
507 p-value was less than 0.05. Sample-specific details are listed in the figure legends.



## 508 **Protoplast preparation and transfection**

509 Protoplasts were extracted and transfected as described previously (Yoo, Cho and Sheen,  
510 2007). True leaves from 4-5-week-old Arabidopsis plants were cut in 1mm leaf strips using a  
511 razor blade. Leaf strips were immediately submerged into an enzyme solution containing  
512 20mM MES (Sigma) pH 5.7, 1.5% (w/v) cellulase R10 (Yakult Pharmaceuticals, Japan),  
513 0.4% (w/v) macerozyme R10 (Yakult Pharmaceuticals, Japan), 0.4M mannitol, 20mM KCl,  
514 10mM CaCl<sub>2</sub> and 0.1% bovine serum albumin (BSA). The enzyme solution was warmed to at  
515 55 °C for 10min and filtered with 0.45µm syringe filter before use. Leaf strips were vacuum-  
516 infiltrated for 30 minutes in the dark and left at room temperature in the dark for 3 hours. The  
517 protoplasts in solution were then diluted with an equal volume of W5 solution containing  
518 2mM MES pH 5.7, 154mM NaCl, 125mM CaCl<sub>2</sub>, 5mM KCl and filtered with a 75µm nylon  
519 mesh. Protoplasts were pelleted in a 30ml round-bottom Oak Ridge centrifuge tube at 150g,  
520 for 1min and re-suspended at  $2 \times 10^5$  ml<sup>-1</sup> in W5 solution (the number of protoplasts was  
521 counted using a haemocytometer). Protoplasts were kept on ice for 30 minutes, pelleted at  
522 150g and re-suspended at  $2 \times 10^5$  ml<sup>-1</sup> in MMG solution containing 4mM MES pH 5.7, 0.4M  
523 mannitol and 15mM MgCl<sub>2</sub>, at room temperature before DNA/PEG/Calcium transfection. For  
524 transfection, 10µg of plasmid DNA was mixed gently with 100µl of protoplasts and 110µl  
525 PEG/Calcium solution containing 20% (w/v) PEG4000, 0.2M mannitol and 100mM CaCl<sub>2</sub>.  
526 The transfection mixture was incubated at room temperature for 5 minutes, diluted with W5  
527 solution and centrifuged at 100g for 2min. Protoplasts were then re-suspended in WI solution  
528 containing 4mM MES pH 5.7, 0.5M mannitol and 20mM KCl and incubated at room  
529 temperature for about 16 hours. Transfected protoplasts in WI were centrifuged at 100g for  
530 2min, the supernatant was removed, and the pellet was frozen on dry ice before being stored  
531 at -70 °C for further analyses.

## 532 **Microscopy**

533 Confocal microscopy was performed on a Leica SP5, Leica SP8, or ZEISS LSM800 with a  
534 25× water-dipping lens (HCX IRAPO 25.0 × 0.95 water), a 40× oil immersion lens (HCX  
535 PLAPO CS 40.0× 1.25 OIL), a 63× oil immersion lens (Plan-APOCHROMAT 63×/1.4 oil)  
536 or a 63×/1.2 water immersion objective lens (C-APOCHROMAT 63×/1.2 water). Citrine was  
537 excited with a 488 nm or 514 nm argon laser and collected at 525–560 nm. mRFP and  
538 mCherry were excited with a 561 nm DPSS laser and collected at 600-640 nm, GFP was

539 excited with a 488 nm argon laser and collected at 505-530 nm, aniline blue was excited with  
540 a 405 nm UV laser and collected at 430-550 nm.

#### 541 **Plasmodesmal callose staining and quantification**

542 Plasmodesmal callose staining and quantification was performed as described (Xu *et al.*,  
543 2017). The 8<sup>th</sup> leaf of 5-6-week-old Arabidopsis plants was infiltrated with water or chitin.  
544 One hour after treatment, the leaf tissue was infiltrated with 0.01% aniline blue in PBS buffer  
545 (pH 7.4). Three areas were cut from one leaf and three different sites were imaged from each  
546 area. Callose deposits were imaged from the abaxial side of the leaf using a 63× oil  
547 immersion lens (Plan-APOCHROMAT 63×/1.4 oil) with a Leica SP5 confocal microscope.  
548 Aniline blue was excited with a 405 nm UV laser and collected at 430-550 nm. This was  
549 replicated for 5-12 leaves per genotype and treatment. Aniline blue stained plasmodesmal  
550 callose was quantified using automated image analysis pipeline “find plasmodesmata” written  
551 in Python (Xu *et al.*, 2017) (<https://github.com/JIC-CSB/find-plasmodesmata>). Three-  
552 dimensional segmentation was carried out by initially thresholding the input image  
553 (experimentally adjusted: default min 8000, max 15000). The resulting binary image was  
554 then segmented by connected component analysis. Post segmentation filtering was based on  
555 the number of voxels in each connected component. Objects <2 voxels (noise) and objects  
556 >100 voxels (callose accumulated in stomata) were removed. All annotated images were  
557 sanity checked prior to inclusion of data in the final set. The normality of each data set was  
558 assessed by a Shapiro-Wilk test. When normally distributed a Student’s t-test was applied and  
559 when the data was not normally distributed a non-parametric Mann-Whitney U test was used.  
560 Statistical significance was concluded when p-value was less than 0.05. Sample-specific  
561 details are listed in the figure legends.

#### 562 **PD index (plasmodesmata/PM fluorescence intensity ratio)**

563 Leaves of *N. benthamiana* transiently expressing the constructs of interest were observed 30  
564 min after infiltration with chitin (500 µg/mL) or water (mock conditions) for PD index  
565 determination. The abaxial side of the leaf samples was imaged using a 63×/1.2 water  
566 immersion objective lens (C-APOCHROMAT 63×/1.2 water) with either a Leica SP8 or  
567 Zeiss LSM800 confocal microscope. PD index was determined by measuring the intensity  
568 values of Citrine-LYM2 at plasmodesmata and in two surrounding PM regions with ImageJ.  
569 PD index values were averaged for each image and 31 images for mock and chitin treatments  
570 were analysed by a Student’s t-test.

## 571 **Fluorescence Anisotropy**

572 Leaves of *N. benthamiana* transiently expressing Citrine-LYM2 and cytosolic GFP were  
573 imaged with a Leica SP8 confocal microscope. Citrine was excited with a pulsed white light  
574 laser (488 nm) and emitted light was separated in to parallel and perpendicular polarizations  
575 and detected by external SPADs with 500-550 nm filters. A series of 20 frames were merged  
576 and analysed using PicoQuant SymPhoTime 64. Anisotropy ( $r$ ) was calculated by

$$577 \quad r = \frac{I_{\parallel} - GI_{\perp}}{(2 - 3L_1)I_{\perp} + (1 - 3L_2)I_{\parallel}}$$

578 where  $G=0.481$ ,  $L_1=0.013$  and  $L_2=0.037$ . ROIs were defined that correlated to  
579 plasmodesmata and the PM for Citrine-LYM2 images or the cytosol for GFP images.

## 580 **FRET-FLIM analysis**

581 Leaves of *N. benthamiana* transiently expressing the constructs of interest were used 30 min  
582 after infiltration with chitin (500  $\mu\text{g}/\text{mL}$ ) or water (mock conditions) for FRET-FLIM. The  
583 abaxial side of the leaf samples was imaged using a 63x/1.2 water immersion objective lens  
584 (Leica C-APOCHROMAT 63x/1.2 water). FLIM experiments were performed using a Leica  
585 TCS SP8X confocal microscope equipped with TCSPC (time correlated single photon  
586 counting) electronics (PicoHarp 300), photon sensitive detectors (HyD SMD detector), a  
587 pulsed laser (white light laser, WLL) with a range from 470 to 670nm. The WLL at 488 nm  
588 was used to excite GFP at 488nm. Laser power was kept low (0.5-3%) to avoid any bleaching  
589 of the samples. GFP emission was collected between 509-530nm. The repetition rate was set  
590 up to 40Mhz. Additional 488nm and 561nm notch filters were used to reduce interference  
591 reflected light. The instrument response function (IRF) was measured using erythrosine B as  
592 described (Stahl *et al.*, 2013). The FLIM data sets were recorded using the Leica LASX  
593 FLIM wizard linked to the PicoQuant SymPhoTime 64 software. The FLIM data sets were  
594 acquired by scanning each image until a suitable number of photon counts per pixel  
595 (minimum 1000) was reached. For the acquisition, the image size was set to  $250 \times 50$  pixels  
596 with a speed of 50Hz, allowing a pixel dwell time of  $19\mu\text{s}$ . The laser power was adjusted to  
597 reach a maximum count of 2000 kcounts per second. Each acquisition was stopped after 40  
598 frames. Data were analysed by obtaining excited-state lifetime values of a region of interest  
599 (plasma membrane or plasmodesmata). Calculations were performed using the PicoQuant  
600 SymPhoTime 64 software instructions for FLIM-FRET-Calculation for Multi-Exponential  
601 Donors, using a two-exponential decay for GFP. The lifetimes were initially estimated by

602 fitting the data using the Monte Carlo method and then by fitting the data using the Maximum  
603 Likely Hood Estimation (MLE). The amplitude weighted average donor lifetime with model  
604 parameter  $n=2$  was used to calculate the average FRET-efficiency. FRET efficiency ( $E$ ) was  
605 calculated by comparing the lifetime of the donor in the presence  $\tau_{DA}$  or absence  $\tau_D$  of the  
606 acceptor according to the following formula:  $E = 1 - \frac{\tau_{DA}}{\tau_D}$ . Data was analysed either by  
607 Student's t-test for pairwise comparisons, or by ANOVA with Tukey-kramer post-hoc  
608 analysis for multiple comparisons. Statistical significance was concluded when p-value was  
609 less than 0.05. Sample-specific details are listed in the figure legends.

### 610 **FRAP analysis**

611 For FRAP experiments we used leaves of *N. benthamiana* transiently expressing Citrine-  
612 LYM2, LYK4-RFP or LYK5-RFP treated for 30 min with chitin (500  $\mu\text{g}/\text{mL}$ ) or water  
613 (mock). FRAP was performed using a Leica TCS SP8X CLSM with a 63x/1.20 water  
614 immersion objective (Leica HC PL APO CS2 63x/1.20). To reduce scanning time the  
615 acquisition window was limited to 512 by 64 pixels. Citrine was excited at 514 nm and  
616 emissions detected between 527-550 nm. RFP was excited at 561 nm and emissions detected  
617 between 567-617 nm. ROIs were defined for plasmodesmata-localised Citrine-LYM2 and for  
618 PM-localised Citrine-LYM2, LYK4-RFP and LYK5-RFP. The FRAP protocol was as  
619 follows: 30 iterations were imaged at 0.095 sec/frame (pre-bleach); 15 (Citrine) or 60 (RFP)  
620 iterations at 0.095 sec/frame (bleach); and 50 iterations at 0.095 sec/frame followed by 120  
621 iterations every 0.5 s (post-bleach). For bleach iterations the laser power was set to 100% and  
622 the FRAP booster was used.

623 Intensity data were normalised to the mean intensity of the first five frames and corrected for  
624 bleaching induced by pre- and post-bleach iterations. For the latter we collected non-bleached  
625 image acquisition decay curves. These data were themselves normalised to mean intensity of  
626 the first five frames and were fitted by a LOESS regression. Thus, all experimental FRAP  
627 data was corrected as follows:

$$628 \quad I_{corr} = I_{norm} + (100 - I_{decay}) [\%]$$

629  $I_{corr}$  is the corrected intensity,  $I_{norm}$  is the normalised intensity,  $I_{decay}$  is the modelled intensity  
630 from the acquisition decay curve.

631 Data was further transformed to set the bleach base-line to zero: thus

$$I_{final} = \frac{I_{corr} - I_{bleach}}{I_{pre-bleach}} * 100 [\%]$$

632  
633  $I_{final}$  is the final intensity,  $I_{bleach}$  is the intensity at the last bleach interaction,  $I_{pre-bleach}$  is the  
634 mean of the pre-bleach values.

635 A LOESS curve was modelled to each dataset and each curve fit was sanity checked (Spira *et*  
636 *al.*, 2012). The intensity value at 60 s post-bleach was used as an approximation of the  
637 relative mobile fraction, adapted from Martiniere *et al.* (2012). Pairwise comparisons of  
638 estimated marginal means were performed in R 3.5.1 (R Core Team, 2018) using emmeans  
639 (Lenth *et al.*, 2018; <https://cran.r-project.org/web/packages/emmeans/index.html>).

### 640 **Co-immunoprecipitation**

641 Proteins were isolated using an extraction buffer containing 50 mM Tris-HCl pH 7.5, 150  
642 mM NaCl, 5mM dithiothreitol (DTT), protease inhibitor cocktail (Sigma) 1:100, phosphatase  
643 inhibitor (Sigma) 1:200, 1 mM phenylmethanesulfonyl fluoride (PMSF) and 0.5% IGEPAL<sup>®</sup>  
644 CA-630 (Sigma). For co-immunoprecipitation, GFP-Trap agarose beads (ChromoTek) were  
645 incubated with the protein samples for 2 hours at 4 °C with gentle agitation. Beads were then  
646 washed three times with a washing buffer containing 50 mM Tris-HCl pH 7.5, 150 mM  
647 NaCl, 5mM dithiothreitol, protease inhibitor cocktail 1:100, phosphatase inhibitor 1:200, 1  
648 mM phenylmethanesulfonyl fluoride and 0.1% IGEPAL. After addition of Laemmli buffer  
649 (2×) containing 50 mM Tris-HCl pH 7, 5% SDS, 20% glycerol, 2% bromophenol blue, 5% β-  
650 mercaptoethanol, samples were boiled for 15 minutes at 95 °C. Protein samples were  
651 analysed by SDS-PAGE and transferred to Immuno-blot<sup>®</sup> PVDF membrane. Proteins were  
652 detected with α-GFP-HRP (Miltenyi Biotec, 130-091-833), α-Myc-HRP (Abcam, ab622928),  
653 α-HA-HRP (Abcam, ab173826), α-RFP-biotin (Abcam, ab34771) antibodies. α-RFP-biotin  
654 was detected using α-rabbit IgG–Alkaline Phosphatase (Sigma, a3687).

655

### 656 **Plasmodesmata extraction**

657 The plasmodesmal purification method from Arabidopsis suspension cultures cells was  
658 modified for use with mature leaf tissue. Four expanded 5-week-old *N. benthamiana* leaves,  
659 transiently expressing the desired construct, were ground in liquid nitrogen to a fine powder.  
660 The powder was ultrasonicated in extraction buffer (50 mM Tris-HCl pH 7.5, 150 mM NaCl,  
661 1× cOmplete<sup>™</sup> ULTRA EDTA-free protease inhibitors (Roche), 1 mM PMSF, 1% w/v PVP-

662 40kDa (Sigma)), followed by high-pressure homogenisation (EmulsiFlex B15, Avestin) to  
663 produce the “Total” fraction. Triton-X100 (0.5% v/v) was added to the resultant homogenate  
664 and the sample was centrifuged at 400g at 4°C to collect a crude cell wall extraction. Cell  
665 walls were washed five times with extraction buffer, and once in cellulase buffer (20 mM  
666 MES-KOH pH 5.5, 100mM NaCl, 1× cOmplete™ ULTRA EDTA-free protease inhibitors  
667 (Roche), 1 mM PMSF, 4.4% w/v mannitol). Washed cell wall material was resuspended in an  
668 equal volume of cellulase buffer with 2% (w/v) Cellulase R-10 (Yakult pharmaceuticals,  
669 Japan) and shaken at 37°C for one hour. Undigested cell wall material was removed by  
670 centrifugation at 2500g at 4°C. The supernatant was ultracentrifuged at 130,000g at 4°C to  
671 collect plasmodesmal membranes. The membrane pellet was resuspended in 50 µL  
672 resuspension buffer (50 mM Tris-HCl pH 7.5, 150 mM NaCl, 5 mM DTT, 1× cOmplete™  
673 ULTRA EDTA-free protease inhibitors (Roche), 1 mM PMSF, 0.2% v/v IPEGAL® CA-630  
674 (Sigma)) as a “PD” fraction. Protein extracts were boiled in Laemmli buffer and separated by  
675 10% SDS-PAGE. Proteins were transferred to Immuno-blot® PVDF (0.2 µm, Bio-Rad) by  
676 semi-dry transfer. The membrane was probed with primary-conjugated HRP antibodies  
677 against HA (1:5000, ab173826, Abcam) and Myc (1:5000, ab62928, Abcam). HRP signal  
678 was developed with SuperSignal West Femto (ThermoFisher) and detected using  
679 ImageQuant LAS 500 (GE Healthcare).

## 680 **ROS burst measurement**

681 Leaf discs (4 mm in diameter) were immersed in in 96-well white plates (Greiner bio-one)  
682 containing sterile water overnight in the dark. The next day, the water was replaced by a  
683 solution containing 20 µg/mL HRP (Sigma), 17 µg/mL luminol (Sigma), and chitin (NaCoSy,  
684 500 µg/mL) or water (mock). Integrated luminescence was measured using a luminometer  
685 (Varioskan Flash) for 40 minutes. The normality of each data set was assessed and confirmed  
686 by a Shapiro-Wilk test. Thus, a Student’s t-test was applied for pairwise comparisons and  
687 significant differences were concluded when p-value was less than 0.05. Sample-specific  
688 details are listed in the figure legends.

## 689 **Statistical analyses**

690 Statistical analyses were performed using Genstat® version 18 or R 3.5.1. Details are in the  
691 relevant methods section and/or figure legends. n-values are detailed in Table S1.

692

693 **Acknowledgements**

694 The authors acknowledge access to the JIC Bioimaging Facility we thank the staff for their  
695 assistance and training with the microscopes. The authors particularly thank Grant Calder and  
696 Yvonne Stahl (University of Düsseldorf) for assistance in developing the FRET-FLIM  
697 methods. *lyk3*, *lyk4* and *lyk5-2* seeds were provided by Gary Stacey. This work was funded  
698 by: the Biotechnology and Biological Research Council (BB/L000466/1, CF;  
699 BBS/E/J/000PR9796, CF); the European Research Council (grant ‘INTERCELLAR’, CF);  
700 and the Gatsby Charitable Foundation (CZ). The authors thank Caroline Dean for discussions  
701 and critical reading of the manuscript.

702

703

704 **References**

- 705 Benitez-Alfonso Y, Faulkner C, Pendle A, Miyashima S, Helariutta Y, Maule A. 2013.  
706 Symplastic intercellular connectivity regulates lateral root patterning. *Dev Cell* **26**:136–  
707 147. doi:10.1016/j.devcel.2013.06.010
- 708 Bucherl CA, Jarsch IK, Schudoma C, Segonzac C, Mbengue M, Robatzek S, MacLean D, Ott  
709 T, Zipfel C. 2017. Plant immune and growth receptors share common signalling  
710 components but localise to distinct plasma membrane nanodomains. *Elife* **6**.  
711 doi:10.7554/eLife.25114
- 712 Cao Y, Liang Y, Tanaka K, Nguyen CT, Jedrzejczak RP, Joachimiak A, Stacey G. 2014. The  
713 kinase LYK5 is a major chitin receptor in Arabidopsis and forms a chitin-induced  
714 complex with related kinase CERK1. *Elife* **3**. doi:10.7554/eLife.03766
- 715 Cui W, Lee JY. 2016. Arabidopsis callose synthases CalS1/8 regulate plasmodesmal  
716 permeability during stress. *Nat Plants* **2**:16034. doi:10.1038/nplants.2016.34
- 717 Danila FR, Quick WP, White RG, Kelly S, von Caemmerer S, Furbank RT. 2018. Multiple  
718 mechanisms for enhanced plasmodesmata density in disparate subtypes of C4 grasses. *J*  
719 *Exp Bot* **69**:1135–1145. doi:10.1093/jxb/erx456
- 720 Dubiella U, Seybold H, Durian G, Komander E, Lassig R, Witte CP, Schulze WX, Romeis T.  
721 2013. Calcium-dependent protein kinase/NADPH oxidase activation circuit is required  
722 for rapid defense signal propagation. *Proc Natl Acad Sci U S A* **110**:8744–8749.  
723 doi:10.1073/pnas.1221294110
- 724 Erwig J, Ghareeb H, Kopischke M, Hacke R, Matei A, Petutschnig E, Lipka V. 2017. Chitin-  
725 induced and CHITIN ELICITOR RECEPTOR KINASE1 (CERK1) phosphorylation-  
726 dependent endocytosis of Arabidopsis thaliana LYSIN MOTIF-CONTAINING  
727 RECEPTOR-LIKE KINASE5 (LYK5). *New Phytol* **215**:382–396.  
728 doi:10.1111/nph.14592
- 729 Faulkner C, Akman OE, Bell K, Jeffree C, Oparka K. 2008. Peeking into pit fields: a multiple  
730 twinning model of secondary plasmodesmata formation in tobacco. *Plant Cell* **20**:1504–  
731 1518. doi:10.1105/tpc.107.056903
- 732 Faulkner C, Petutschnig E, Benitez-Alfonso Y, Beck M, Robatzek S, Lipka V, Maule AJ.  
733 2013. LYM2-dependent chitin perception limits molecular flux via plasmodesmata.  
734 *Proc Natl Acad Sci U S A* **110**:9166–9170. doi:10.1073/pnas.1203458110
- 735 Fernandez-Calvino L, Faulkner C, Walshaw J, Saalbach G, Bayer E, Benitez-Alfonso Y,  
736 Maule A. 2011. Arabidopsis plasmodesmal proteome. *PLoS One* **6**:e18880.  
737 doi:10.1371/journal.pone.0018880
- 738 Grison MS, Brocard L, Fouillen L, Nicolas W, Wewer V, Dormann P, Nacir H, Benitez-  
739 Alfonso Y, Claverol S, Germain V, Boutte Y, Mongrand S, Bayer EM. 2015. Specific  
740 membrane lipid composition is important for plasmodesmata function in Arabidopsis.  
741 *Plant Cell* **27**:1228–1250. doi:10.1105/tpc.114.135731
- 742 Gronnier J, Gerbeau-Pissot P, Germain V, Mongrand S, Simon-Plas F. 2018. Divide and  
743 Rule: Plant Plasma Membrane Organization. *Trends Plant Sci* **23**:899–917.  
744 doi:10.1016/j.tplants.2018.07.007
- 745 Hayafune M, Berisio R, Marchetti R, Silipo A, Kayama M, Desaki Y, Arima S, Squeglia F,



- 746 Ruggiero A, Tokuyasu K, Molinaro A, Kaku H, Shibuya N. 2014. Chitin-induced  
747 activation of immune signalling by the rice receptor CEBiP relies on a unique sandwich-  
748 type dimerization. *Proc Natl Acad Sci U S A* **111**:E404-13.  
749 doi:10.1073/pnas.1312099111
- 750 Hayashi F, Smith KD, Ozinsky A, Hawn TR, Yi EC, Goodlett DR, Eng JK, Akira S,  
751 Underhill DM, Aderem A. 2001. The innate immune response to bacterial flagellin is  
752 mediated by Toll-like receptor 5. *Nature* **410**:1099–1103. doi:10.1038/35074106
- 753 Hillmer RA, Tsuda K, Rallapalli G, Asai S, Truman W, Papke MD, Sakakibara H, Jones  
754 JDG, Myers CL, Katagiri F. 2017. The highly buffered Arabidopsis immune signalling  
755 network conceals the functions of its components. *PLoS Genet* **13**:e1006639.  
756 doi:10.1371/journal.pgen.1006639
- 757 Hunter K, Kimura S, Rokka A, Tran C, Toyota M, Kukkonen JP, Wrzaczek M. 2019. CRK2  
758 enhances salt tolerance by regulating callose deposition in connection with PLD $\alpha$ 1.  
759 *bioRxiv* 487009. doi:10.1101/487009
- 760 Kadota Y, Liebrand TWH, Goto Y, Sklenar J, Derbyshire P, Menke FLH, Torres MA,  
761 Molina A, Zipfel C, Coaker G, Shirasu K. 2018. Quantitative phosphoproteomic  
762 analysis reveals common regulatory mechanisms between effector- and PAMP-triggered  
763 immunity in plants. *New Phytol.* doi:10.1111/nph.15523
- 764 Kadota Y, Sklenar J, Derbyshire P, Stransfeld L, Asai S, Ntoukakis V, Jones JD, Shirasu K,  
765 Menke F, Jones A, Zipfel C. 2014. Direct regulation of the NADPH oxidase RBOHD by  
766 the PRR-associated kinase BIK1 during plant immunity. *Mol Cell* **54**:43–55.  
767 doi:10.1016/j.molcel.2014.02.021
- 768 Kaku H, Nishizawa Y, Ishii-Minami N, Akimoto-Tomiyama C, Dohmae N, Takio K, Minami  
769 E, Shibuya N. 2006. Plant cells recognize chitin fragments for defense signalling  
770 through a plasma membrane receptor. *Proc Natl Acad Sci U S A* **103**:11086–11091.  
771 doi:10.1073/pnas.0508882103
- 772 Kofoed EM, Vance RE. 2011. Innate immune recognition of bacterial ligands by NAIPs  
773 determines inflammasome specificity. *Nature* **477**:592–595. doi:10.1038/nature10394
- 774 Lee J-YY, Wang X, Cui W, Sager R, Modla S, Czymmek K, Zybaliov B, van Wijk K, Zhang  
775 C, Lu H, Lakshmanan V. 2011. A Plasmodesmata-Localized Protein Mediates Crosstalk  
776 between Cell-to-Cell Communication and Innate Immunity in Arabidopsis. *Plant Cell*  
777 **23**:3353–3373. doi:10.1105/tpc.111.087742
- 778 Li L, Li M, Yu L, Zhou Z, Liang X, Liu Z, Cai G, Gao L, Zhang X, Wang Y, Chen S, Zhou  
779 JM. 2014. The FLS2-associated kinase BIK1 directly phosphorylates the NADPH  
780 oxidase RbohD to control plant immunity. *Cell Host Microbe* **15**:329–338.  
781 doi:10.1016/j.chom.2014.02.009
- 782 Liang P, Stratil TF, Popp C, Marin M, Folgmann J, Mysore KS, Wen J, Ott T. 2018.  
783 Symbiotic root infections in *Medicago truncatula* require remorin-mediated receptor  
784 stabilization in membrane nanodomains. *Proc Natl Acad Sci U S A* **115**:5289–5294.  
785 doi:10.1073/pnas.1721868115
- 786 Liao D, Cao Y, Sun X, Espinoza C, Nguyen CT, Liang Y, Stacey G. 2017. Arabidopsis E3  
787 ubiquitin ligase PLANT U-BOX13 (PUB13) regulates chitin receptor LYSIN MOTIF  
788 RECEPTOR KINASE5 (LYK5) protein abundance. *New Phytol.* doi:10.1111/nph.14472

- 789 Lim GH, Shine MB, de Lorenzo L, Yu K, Cui W, Navarre D, Hunt AG, Lee JY, Kachroo A,  
790 Kachroo P. 2016. Plasmodesmata Localizing Proteins Regulate Transport and Signaling  
791 during Systemic Acquired Immunity in Plants. *Cell Host Microbe* **19**:541–549.  
792 doi:10.1016/j.chom.2016.03.006
- 793 Lingwood D, Simons K. 2010. Lipid rafts as a membrane-organizing principle. *Science (80- )*  
794 **327**:46–50. doi:10.1126/science.1174621
- 795 Malinsky J, Opekarova M, Grossmann G, Tanner W. 2013. Membrane microdomains, rafts,  
796 and detergent-resistant membranes in plants and fungi. *Annu Rev Plant Biol* **64**:501–  
797 529. doi:10.1146/annurev-arplant-050312-120103
- 798 Martiniere A, Lavagi I, Nageswaran G, Rolfe DJ, Maneta-Peyret L, Luu DT, Botchway SW,  
799 Webb SE, Mongrand S, Maurel C, Martin-Fernandez ML, Kleine-Vehn J, Friml J,  
800 Moreau P, Runions J. 2012. Cell wall constrains lateral diffusion of plant plasma-  
801 membrane proteins. *Proc Natl Acad Sci U S A* **109**:12805–12810.  
802 doi:10.1073/pnas.1202040109
- 803 Miya A, Albert P, Shinya T, Desaki Y, Ichimura K, Shirasu K, Narusaka Y, Kawakami N,  
804 Kaku H, Shibuya N. 2007. CERK1, a LysM receptor kinase, is essential for chitin  
805 elicitor signalling in Arabidopsis. *Proc Natl Acad Sci U S A* **104**:19613–19618.  
806 doi:10.1073/pnas.0705147104
- 807 Mori IC, Murata Y, Yang Y, Munemasa S, Wang YF, Andreoli S, Tiriach H, Alonso JM,  
808 Harper JF, Ecker JR, Kwak JM, Schroeder JI. 2006. CDPKs CPK6 and CPK3 function  
809 in ABA regulation of guard cell S-type anion- and Ca(2+)-permeable channels and  
810 stomatal closure. *PLoS Biol* **4**:e327. doi:10.1371/journal.pbio.0040327
- 811 Mueller TD, Nickel J. 2012. Promiscuity and specificity in BMP receptor activation. *FEBS*  
812 *Lett* **586**:1846–1859. doi:10.1016/j.febslet.2012.02.043
- 813 Ott T. 2017. Membrane nanodomains and microdomains in plant-microbe interactions. *Curr*  
814 *Opin Plant Biol* **40**:82–88. doi:10.1016/j.pbi.2017.08.008
- 815 Pan L, Fu T-M, Zhao W, Zhao L, Chen W, Qiu C, Liu W, Liu Z, Piai A, Fu Q, Chen S, Wu  
816 H, Chou JJ. 2019. Higher-Order Clustering of the Transmembrane Anchor of DR5  
817 Drives Signaling. *Cell* **176**:1477–1489.e14. doi:10.1016/J.CELL.2019.02.001
- 818 Perraki A, Gronnier J, Gouguet P, Boudsocq M, Deroubaix AF, Simon V, German-Retana S,  
819 Legrand A, Habenstein B, Zipfel C, Bayer E, Mongrand S, Germain V. 2018. REM1.3's  
820 phospho-status defines its plasma membrane nanodomain organization and activity in  
821 restricting PVX cell-to-cell movement. *PLoS Pathog* **14**:e1007378.  
822 doi:10.1371/journal.ppat.1007378
- 823 Petutschnig EK, Stolze M, Lipka U, Kopischke M, Horlacher J, Valerius O, Rozhon W, Gust  
824 AA, Kemmerling B, Poppenberger B, Braus GH, Nurnberger T, Lipka V. 2014. A novel  
825 Arabidopsis CHITIN ELICITOR RECEPTOR KINASE 1 (CERK1) mutant with  
826 enhanced pathogen-induced cell death and altered receptor processing. *New Phytol*  
827 **204**:955–967. doi:10.1111/nph.12920
- 828 Płóciennikowska A, Hromada-Judycka A, Borzęcka K, Kwiatkowska K. 2015. Co-operation  
829 of TLR4 and raft proteins in LPS-induced pro-inflammatory signalling. *Cell Mol Life*  
830 *Sci* **72**:557–581. doi:10.1007/s00018-014-1762-5
- 831 Rao S, Zhou Z, Miao P, Bi G, Hu M, Wu Y, Feng F, Zhang X, Zhou JM. 2018. Roles of

- 832 Receptor-Like Cytoplasmic Kinase VII Members in Pattern-Triggered Immune  
833 Signaling. *Plant Physiol* **177**:1679–1690. doi:10.1104/pp.18.00486
- 834 Ren H, Willige BC, Jaillais Y, Geng S, Park MY, Gray WM, Chory J. 2019.  
835 BRASSINOSTEROID-SIGNALING KINASE 3, a plasma membrane-associated  
836 scaffold protein involved in early brassinosteroid signalling. *PLOS Genet* **15**:e1007904.
- 837 Rinne PL, Welling A, Vahala J, Ripel L, Ruonala R, Kangasjarvi J, van der Schoot C. 2011.  
838 Chilling of dormant buds hyperinduces FLOWERING LOCUS T and recruits GA-  
839 inducible 1,3-beta-glucanases to reopen signal conduits and release dormancy in  
840 Populus. *Plant Cell* **23**:130–146. doi:10.1105/tpc.110.081307
- 841 Rinne PLH, Paul LK, van der Schoot C. 2018. Decoupling photo- and thermoperiod by  
842 projected climate change perturbs bud development, dormancy establishment and  
843 vernalization in the model tree Populus. *BMC Plant Biol* **18**:220. doi:10.1186/s12870-  
844 018-1432-0
- 845 Scott FL, Stec B, Pop C, Dobaczewska MK, Lee JJ, Monosov E, Robinson H, Salvesen GS,  
846 Schwarzenbacher R, Riedl SJ. 2008. The Fas–FADD death domain complex structure  
847 unravels signalling by receptor clustering. *Nature* **457**:1019.
- 848 Spira F, Mueller NS, Beck G, von Olshausen P, Beig J, Wedlich-Soldner R. 2012. Patchwork  
849 organization of the yeast plasma membrane into numerous coexisting domains. *Nat Cell*  
850 *Biol* **14**:640–648. doi:10.1038/ncb2487
- 851 Stahl Y, Grabowski S, Bleckmann A, Kuhnemuth R, Weidtkamp-Peters S, Pinto KG,  
852 Kirschner GK, Schmid JB, Wink RH, Hulsewede A, Felekyan S, Seidel CA, Simon R.  
853 2013. Moderation of Arabidopsis root stemness by CLAVATA1 and ARABIDOPSIS  
854 CRINKLY4 receptor kinase complexes. *Curr Biol* **23**:362–371.  
855 doi:10.1016/j.cub.2013.01.045
- 856 Stegmann M, Monaghan J, Smakowska-Luzan E, Rovenich H, Lehner A, Holton N,  
857 Belkhadir Y, Zipfel C. 2017. The receptor kinase FER is a RALF-regulated scaffold  
858 controlling plant immune signalling. *Science (80- )* **355**:287–289.  
859 doi:10.1126/science.aal2541
- 860 Tilsner J, Nicolas W, Rosado A, Bayer EM. 2016. Staying Tight: Plasmodesmal Membrane  
861 Contact Sites and the Control of Cell-to-Cell Connectivity in Plants. *Annu Rev Plant*  
862 *Biol* **67**:337–364. doi:10.1146/annurev-arplant-043015-111840
- 863 Torres MA, Dangl JL, Jones JD. 2002. Arabidopsis gp91phox homologues AtrbohD and  
864 AtrbohF are required for accumulation of reactive oxygen intermediates in the plant  
865 defense response. *Proc Natl Acad Sci U S A* **99**:517–522. doi:10.1073/pnas.012452499
- 866 Vaten A, Dettmer J, Wu S, Stierhof YD, Miyashima S, Yadav SR, Roberts CJ, Campilho A,  
867 Bulone V, Lichtenberger R, Lehesranta S, Mahonen AP, Kim JY, Jokitalo E, Sauer N,  
868 Scheres B, Nakajima K, Carlsbecker A, Gallagher KL, Helariutta Y. 2011. Callose  
869 biosynthesis regulates symplastic trafficking during root development. *Dev Cell*  
870 **21**:1144–1155. doi:10.1016/j.devcel.2011.10.006
- 871 Veronese P, Nakagami H, Bluhm B, Abuqamar S, Chen X, Salmeron J, Dietrich RA, Hirt H,  
872 Mengiste T. 2006. The membrane-anchored BOTRYTIS-INDUCED KINASE1 plays  
873 distinct roles in Arabidopsis resistance to necrotrophic and biotrophic pathogens. *Plant*  
874 *Cell* **18**:257–273. doi:10.1105/tpc.105.035576

- 875 Wan J, Tanaka K, Zhang XC, Son GH, Brechenmacher L, Nguyen TH, Stacey G. 2012.  
876 LYK4, a lysin motif receptor-like kinase, is important for chitin signalling and plant  
877 innate immunity in Arabidopsis. *Plant Physiol* **160**:396–406.  
878 doi:10.1104/pp.112.201699
- 879 Wang L, Li H, Lv X, Chen T, Li R, Xue Y, Jiang J, Jin B, Baluška F, Šamaj J, Wang X, Lin  
880 J. 2015. Spatiotemporal Dynamics of the BRI1 Receptor and its Regulation by  
881 Membrane Microdomains in Living Arabidopsis Cells. *Mol Plant* **8**:1334–1349.  
882 doi:<https://doi.org/10.1016/j.molp.2015.04.005>
- 883 Wang X, Sager R, Cui W, Zhang C, Lu H, Lee JY. 2013. Salicylic acid regulates  
884 Plasmodesmata closure during innate immune responses in Arabidopsis. *Plant Cell*  
885 **25**:2315–2329. doi:10.1105/tpc.113.110676
- 886 Willmann R, Lajunen HM, Erbs G, Newman M-A, Kolb D, Tsuda K, Katagiri F, Fliegmann  
887 J, Bono J-J, Cullimore J V, Jehle AK, Goetz F, Kulik A, Molinaro A, Lipka V, Gust  
888 AA, Nuernberger T. 2011. Arabidopsis lysin-motif proteins LYM1 LYM3 CERK1  
889 mediate bacterial peptidoglycan sensing and immunity to bacterial infection. *Proc Natl*  
890 *Acad Sci U S A* **108**:19824–19829. doi:10.1073/pnas.1112862108
- 891 Winter D, Vinegar B, Nahal H, Ammar R, Wilson G V, Provart NJ. 2007. An “Electronic  
892 Fluorescent Pictograph” browser for exploring and analyzing large-scale biological data  
893 sets. *PLoS One* **2**:e718. doi:10.1371/journal.pone.0000718
- 894 Xu B, Cheval C, Laohavisit A, Hocking B, Chiasson D, Olsson TSG, Shirasu K, Faulkner C,  
895 Gilliam M. 2017. A calmodulin-like protein regulates plasmodesmata closure during  
896 bacterial immune responses. *New Phytol* **215**:77–84. doi:10.1111/nph.14599
- 897 Yamada K, Yamaguchi K, Shirakawa T, Nakagami H, Mine A, Ishikawa K, Fujiwara M,  
898 Narusaka M, Narusaka Y, Ichimura K, Kobayashi Y, Matsui H, Nomura Y, Nomoto M,  
899 Tada Y, Fukao Y, Fukamizo T, Tsuda K, Shirasu K, Shibuya N, Kawasaki T. 2016. The  
900 Arabidopsis CERK1-associated kinase PBL27 connects chitin perception to MAPK  
901 activation. *EMBO J* **35**:2468 LP-2483. doi:10.15252/embj.201694248
- 902 Yoo SD, Cho YH, Sheen J. 2007. Arabidopsis mesophyll protoplasts: a versatile cell system  
903 for transient gene expression analysis. *Nat Protoc* **2**:1565–1572.  
904 doi:10.1038/nprot.2007.199
- 905 Zhao Y, Yang J, Shi J, Gong Y-N, Lu Q, Xu H, Liu L, Shao F. 2011. The NLRC4  
906 inflammasome receptors for bacterial flagellin and type III secretion apparatus. *Nature*  
907 **477**:596–600. doi:10.1038/nature10510
- 908
- 909

910 **Figures and Tables**

911

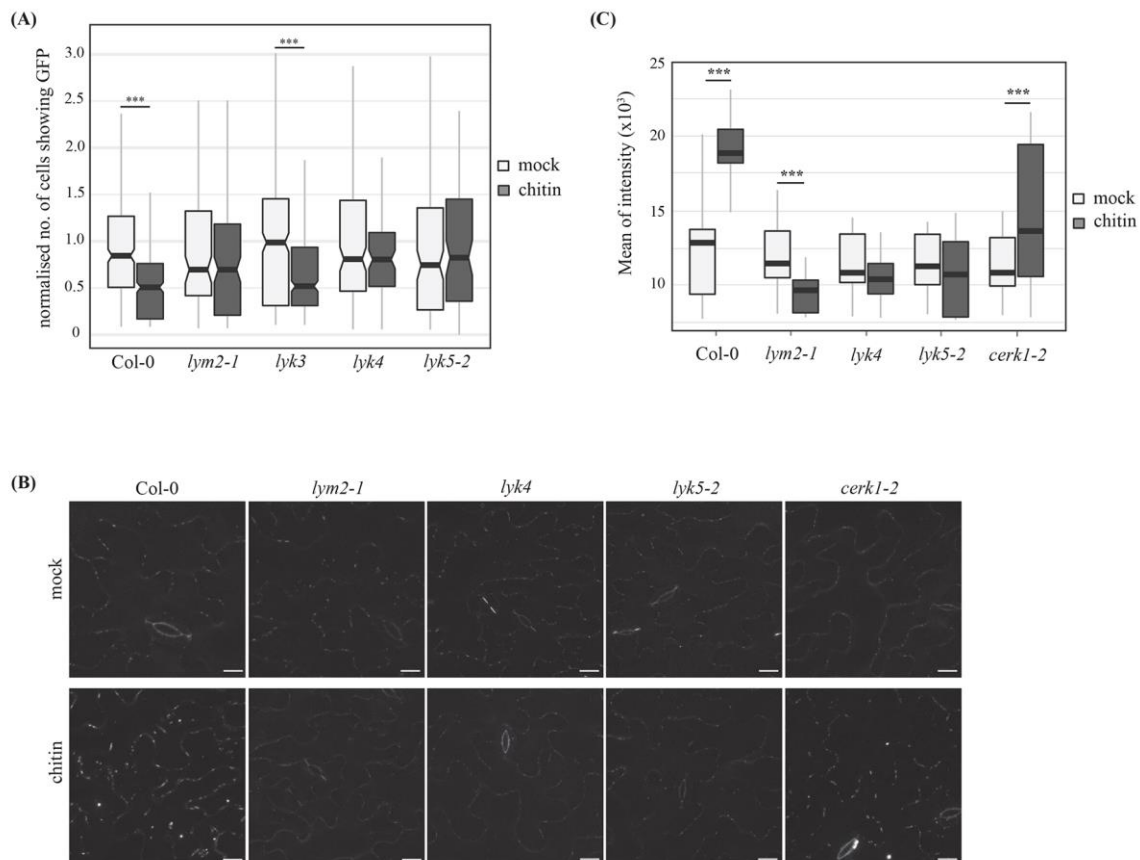

912

Figure 1

913 **Figure 1. LYK4 and LYK5 regulate plasmodesmal permeability in response to chitin**

914 (A) Microprojectile bombardment into leaf tissue of 5–6-week-old Arabidopsis shows that  
915 Col-0 and *lyk3* but not *lym2-1*, *lyk4* and *lyk5-2* exhibit reduced flux of GFP to neighbouring  
916 cells in response to chitin. Data was collected from 6 biological replicates and the number of  
917 cells showing GFP has been normalised to the mean of the mock-treated data within  
918 genotypes. This data is summarised in box-plots in which the line within the box marks the  
919 median, the box signifies the upper and lower quartiles, the whiskers represent the minimum  
920 and maximum within  $1.5 \times$  interquartile range. Notches represent approximate 95%  
921 confidence intervals. Asterisks indicate statistical significance compared to control  
922 conditions ( $n \geq 85$ , \*\*\*p-value < 0.001). (B) Confocal images of aniline blue stained  
923 plasmodesmal callose in leaves of 5–6-week-old Col-0 plants, as well as *lym2-1*, *lyk4*, *lyk5-2*,  
924 and *cerk1-2* mutants. Images were acquired 30 min post-infiltration with water or chitin.  
925 Scale bars are 15 μm. (C) Quantification of plasmodesmata-associated fluorescence of aniline

926 blue stained callose using automated image analysis. Col-0 and the *cerk1-2* mutant show an  
927 increase in aniline blue stained plasmodesmal callose 30 min post-chitin treatment. In *lym2-1*,  
928 *lyk4* and *lyk5-2* this response is not detected. This correlates with the flux phenotype and  
929 identifies that chitin-triggered plasmodesmata closure is caused by callose deposition at  
930 plasmodesmata. The fluorescence intensity is summarised in box-plots in which the line  
931 within the box marks the median, the box signifies the upper and lower quartiles, the  
932 minimum and maximum within  $1.5 \times$  interquartile range. Data was analysed by pairwise  
933 Students' t-test comparing mock to chitin treated tissue within genotypes ( $n \geq 31$ , \*\*\*p-value  
934  $< 0.001$ ).

935

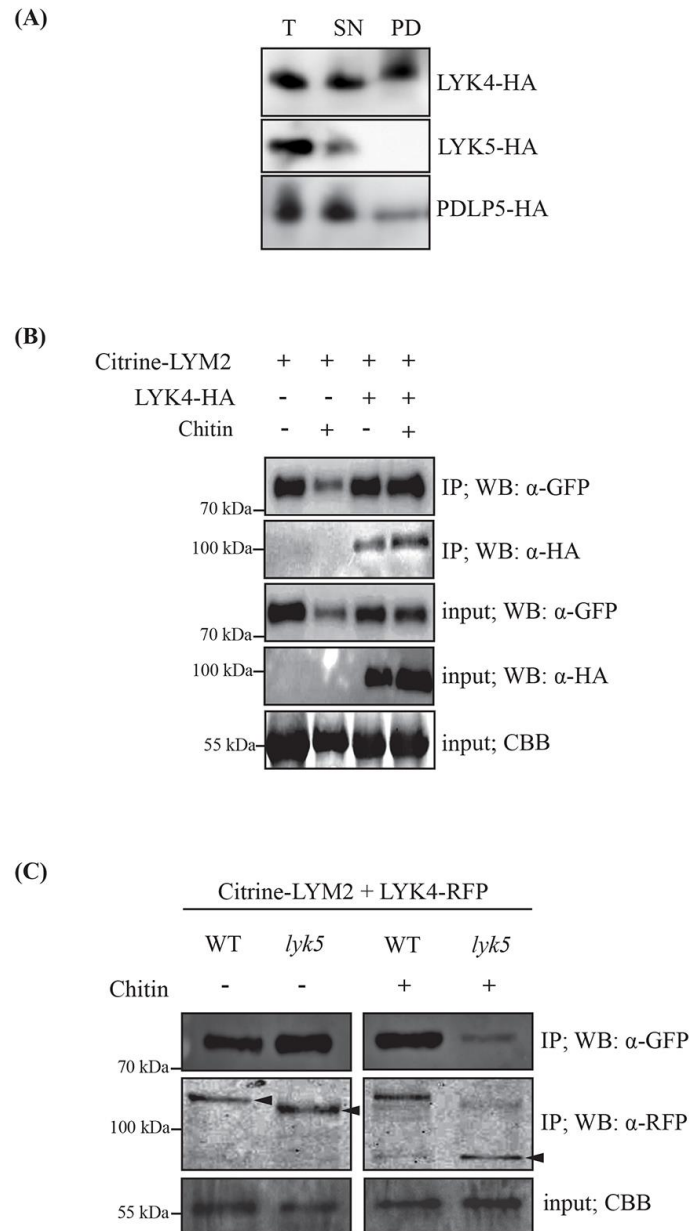

Figure 2

936

937 **Figure 2. LYK4 is detected in plasmodesmata and associates with LYM2**

938 (A) Western blot analysis of purified plasmodesmata fractions from *N. benthamiana* tissue  
939 co-expressing LYK4-HA, LYK5-HA or PDLP5-HA. Total (T; extracts from ground tissue),  
940 supernatant (SN; all cellular material excluding cell walls) and plasmodesmatal (PD;  
941 membranes released from purified cell walls) extracts were separated by SDS-PAGE and  
942 Western blots were probed with anti-HA and to determine the presence of LYK4-HA, LYK5-  
943 HA and PDLP5-HA in each fraction. Experiments were repeated four times with similar

944 results. (B) Western blot analysis of immunoprecipitated protein extracts from *N.*  
945 *benthamiana* tissue expressing Citrine-LYM2 and LYK4-HA. LYK4-HA is detected in  
946 samples purified from membrane fractions by immunoprecipitation of Citrine-LYM2 with  
947 GFP-trap beads. Input and immunoprecipitated (IP) samples were probed  $\alpha$ -GFP and  $\alpha$ -HA  
948 antibodies as indicated. CBB, Coomassie brilliant blue. Size standards are indicated to the left  
949 of the panel. Experiments were repeated three times with similar results. (C) Western blot  
950 analysis of immunoprecipitated protein extracts from Arabidopsis protoplasts expressing  
951 Citrine-LYM2 and LYK4-HA. LYK4-HA is detected in samples purified from membrane  
952 fractions by immunoprecipitation of Citrine-LYM2 with GFP-trap beads from both Col-0 and  
953 *lyk5-2* protoplasts. Input and immunoprecipitated (IP) samples were probed  $\alpha$ -GFP and  $\alpha$ -HA  
954 antibodies as indicated. LYK4-HA bands of different sizes are indicated by arrowheads.  
955 CBB, Coomassie brilliant blue. Size standards are indicated to the left of the panel.  
956 Experiments were repeated three times with similar results.

957



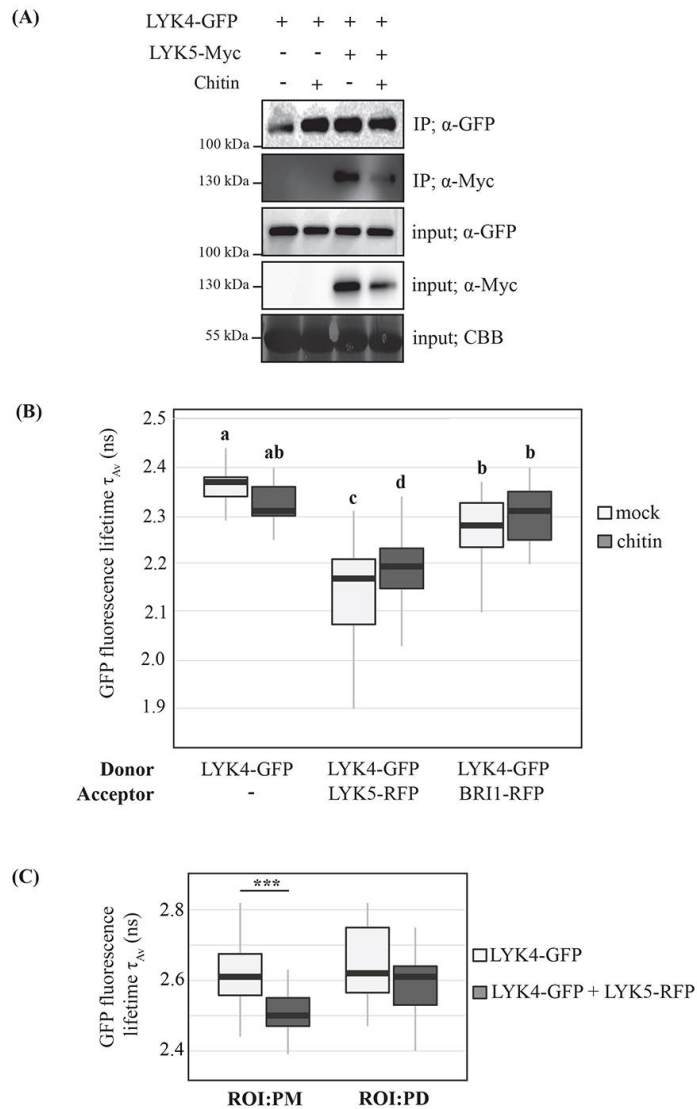

Figure 3

958

959 **Figure 3. LYK5 dynamically associates with LYK4 in the PM**

960 (A) Western blot analysis of immunoprecipitated protein extracts from *N. benthamiana* tissue  
 961 expressing LYK4-GFP and LYK5-Myc. LYK4-GFP was immunoprecipitated from  
 962 membrane fractions and western blots of input and immunoprecipitated extracts were probed  
 963 with  $\alpha$ -GFP and  $\alpha$ -Myc to detect LYK4-GFP and LYK5-Myc respectively. Coomassie  
 964 brilliant blue (CBB) stained membranes serve as a loading control. Size standards are  
 965 indicated to the left of the panel. Experiments were repeated three times with similar results.  
 966 (B) FRET-FLIM analysis of LYK4-GFP in the presence of acceptors LYK5-RFP or BRI1-

967 RFP, and the presence and absence of chitin. Fluorescence lifetime was measured in *N.*  
968 *benthamiana* tissue transiently co-expressing the indicated constructs as donors or acceptors.  
969 Box-plots represent GFP fluorescence-weighted average lifetime ( $\tau_{Av}$ , ns) fitted with a  
970 double-exponential model: the line within the box marks the median, the box signifies the  
971 upper and lower quartiles, the whiskers represent the minimum and maximum within  $1.5 \times$   
972 interquartile range. Data was analysed by ANOVA with a post-hoc Tukey multiple  
973 comparison of means (p-value  $<0.01$ ,  $n \geq 19$ ). Samples with the same letter code are not  
974 significantly different. (C) FRET-FLIM analysis of LYK4-GFP at the plasmodesmal PM and  
975 the PM in the presence and absence of LYK5-RFP RFP. Fluorescence lifetime was measured  
976 in in *N.benthamiana* tissue transiently co-expressing the noted constructs. Plasmodesmata  
977 were marked by co-expression of Citrine-LYM2 and ROI were defined around  
978 plasmodesmata (PD) and in the PM for analysis. Box-plots represent GFP fluorescence-  
979 weighted average lifetime ( $\tau_{Av}$ , ns) fitted with a double-exponential model: the line within the  
980 box marks the median, the box signifies the upper and lower quartiles, the whiskers represent  
981 the minimum and maximum within  $1.5 \times$  interquartile range. Data was analysed by a  
982 Students' t-test in which the lifetime of LYK4-GFP was compared in the absence and  
983 presence of LYK5-RFP for both ROIs. Asterisks indicate statistical significance compared to  
984 control conditions ( $n \geq 27$ , p-value  $< 0.001$ ).

985

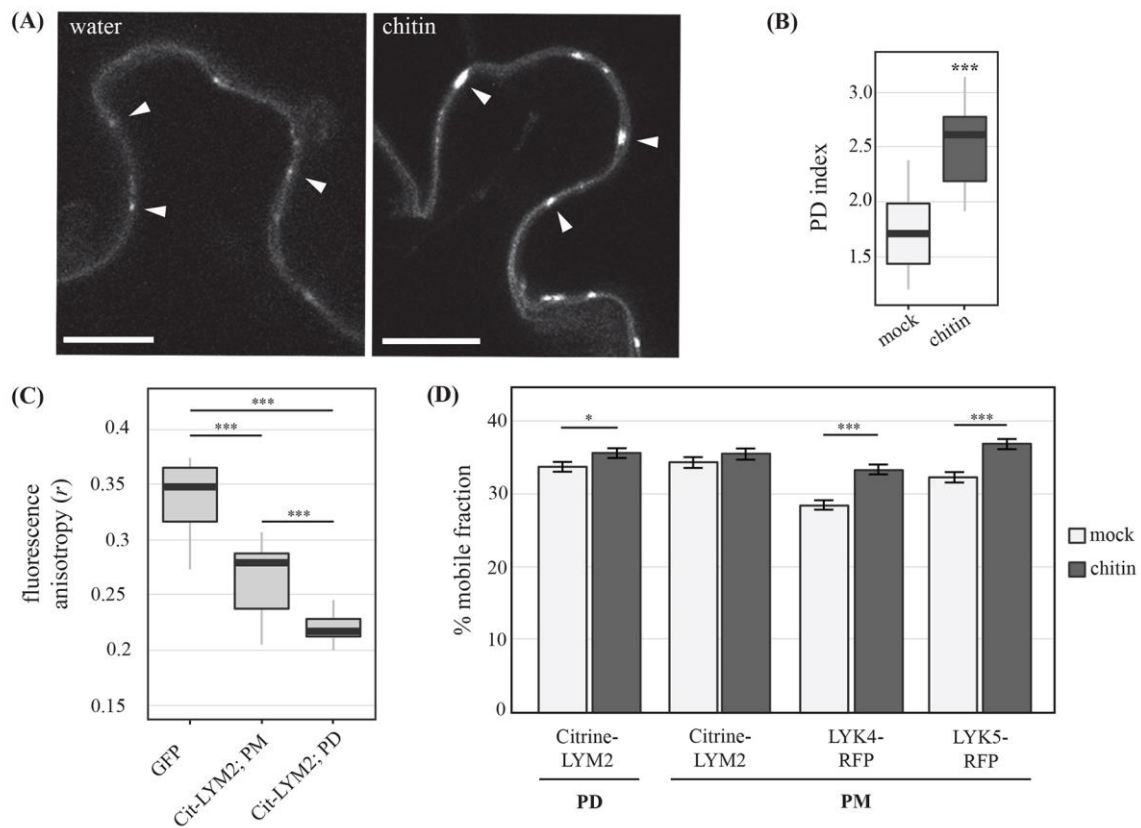

Figure 4

986

987 **Figure 4. LYM2 accumulates at PD in response to chitin**

988 (A) Single plane confocal images of *N. benthamiana* tissue expressing Citrine-LYM2 before  
 989 and after chitin treatment. Left panel shows Citrine-LYM2 in water-treated tissue and the  
 990 right shows Citrine-LYM 30 min post chitin treatment. Arrowheads indicate example  
 991 plasmodesmata. Scale bars, 10 μm. (B) Quantification of the PD index of Citrine-LYM2 at  
 992 PD in *N. benthamiana* after mock and chitin treatments. Data was analysed with a Students t-  
 993 test (\*\*p-value < 0.001, n=31). (C) Fluorescence anisotropy (*r*) of cytosolic GFP, PM  
 994 located Citrine-LYM2 and plasmodesmata-located (PD) Citrine-LYM2. Data was analysed  
 995 pairwise by a Students' t-test (\*\*p-value < 0.001, GFP: n=11, Citrine-LYM2: n=21). (D) %  
 996 mobile fraction of LYM2, LYK4 and LYK5 as measured by FRAP assays. For Citrine-  
 997 LYM2 FRAP measurements were taken for the plasmodesmata-located (PD) and PM-located  
 998 pools of receptor. For LYK4-RFP and LYK5-RFP FRAP measurements were taken in the  
 999 PM. Data was analysed by LOESS regression and estimated marginal means analysis, error  
 1000 bars are standard error (\*\*p-value < 0.001, n ≥ 43).

1001

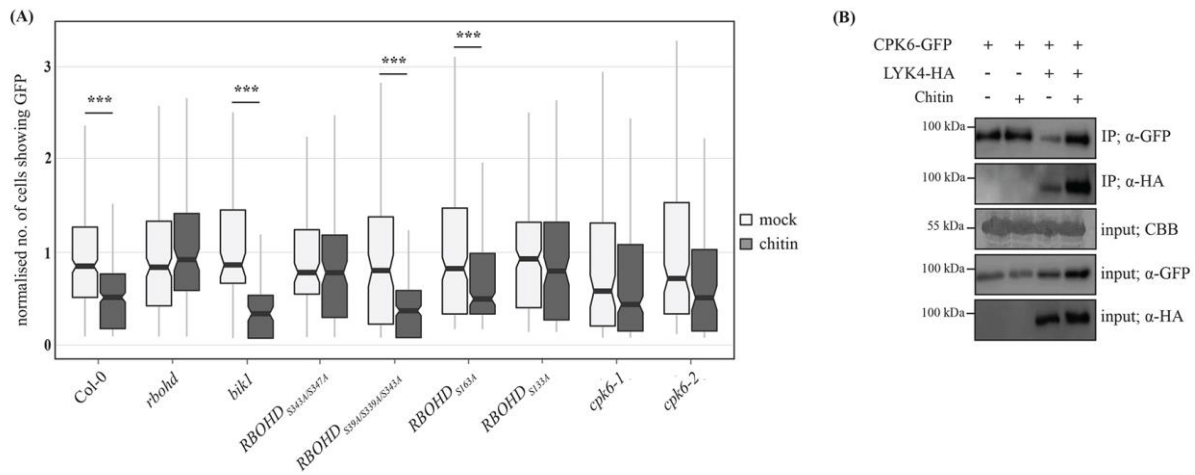

Figure 5

1002

1003 **Figure 5. CPK-dependent phosphorylation of RBOHD is required for plasmodesmata**  
 1004 **closure in response to chitin**

1005 (A) Microprojectile bombardment into leaf tissue shows that *rboh1d* mutants do not show a  
 1006 reduction in GFP flux to neighbouring cells in response to chitin. The *bik1* mutant, and  
 1007 RBOHD phosphosite mutant variants *S39A/S339A/S343A* and *S163A* exhibit a similar  
 1008 reduction in movement of GFP to neighbouring cells in response to chitin. By contrast, the  
 1009 RBOHD phosphosite mutant variants *S343A/S347A* and *S133A*, and the *CPK6* mutants *cpk6-*  
 1010 *1* and *cpk6-2* show no reduction in GFP flux to neighbouring cells in response to chitin. Data  
 1011 was collected from 6 biological replicates and the number of cells showing GFP has been  
 1012 normalised to the mean of the mock data within genotypes. This data is summarised in box-  
 1013 plots in which the line within the box marks the median, the box signifies the upper and lower  
 1014 quartiles, the minimum and maximum within  $1.5 \times$  interquartile range. Notches represent  
 1015 approximate 95% confidence intervals. Data has been analysed by a Students' t-test, or by a  
 1016 Mann-Whitney U-test for non-normal data ( $n \geq 93$ , \*\*\*p-value < 0.001). (B) LYK4 co-  
 1017 immunoprecipitates with CPK6 in *N. benthamiana*. CPK6-GFP was transiently co-expressed  
 1018 with LYK4-HA in *N. benthamiana* leaf tissue and CPK6-GFP was immunoprecipitated using  
 1019 GFP-trap beads. Input and immunoprecipitated (IP) samples were analysed by western blots  
 1020 probed with  $\alpha$ -GFP and  $\alpha$ -HA. Coomassie brilliant blue (CBB) staining of membranes serves  
 1021 as a loading control. The experiment was repeated three times with similar results.

1022

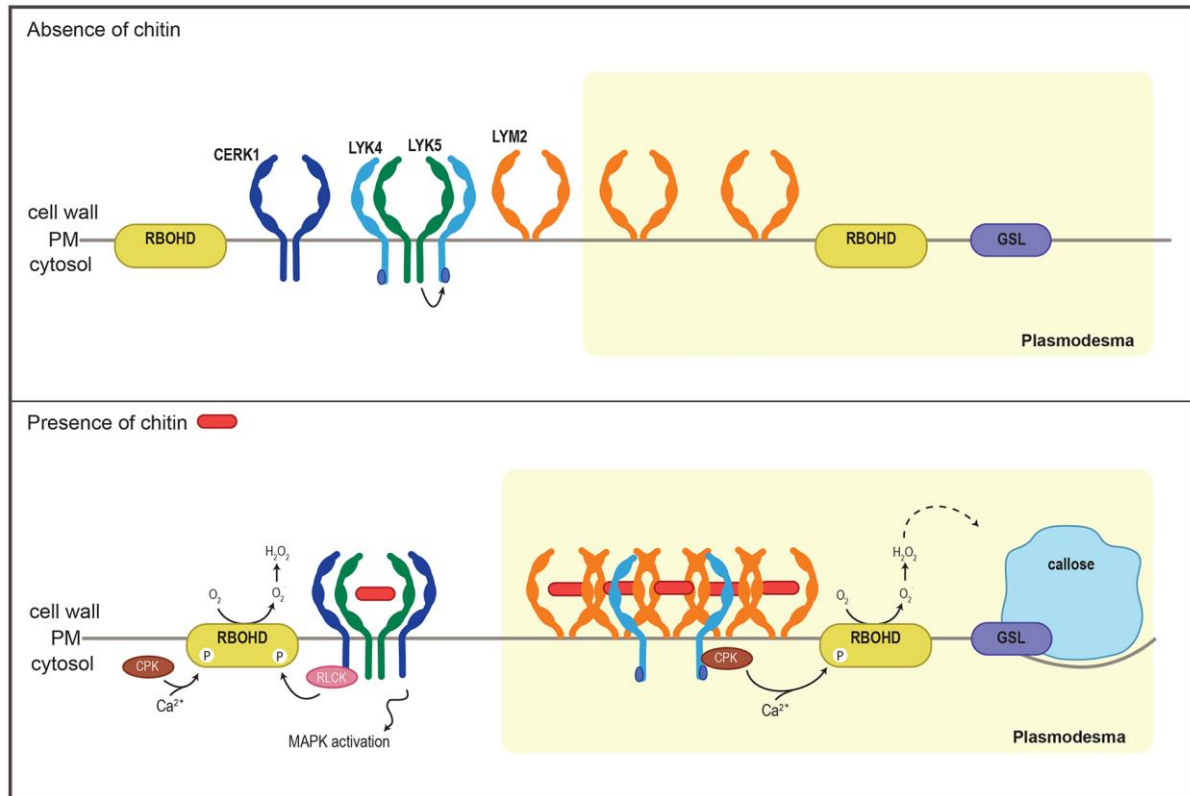

Figure 6

1023

1024 **Figure 6. Model for LYM2-mediated chitin signalling in the plasmodesmal PM.**

1025 This cartoon describes our proposal for some of the key elements of LysM signalling in the  
1026 PM and plasmodesmal PM in response to chitin perception. The top panel represents  
1027 functional, interactions under control conditions. Here, LYK5 (green) interacts with LYK4  
1028 (light blue) and mediates modification of LYK4 in the PM, and LYM2 (orange) is distributed  
1029 throughout the PM and the plasmodesmal PM. In response to chitin (lower panel), LYK4 and  
1030 LYK5 dissociate. LYK5 interacts with CERK1 (dark blue) to mediate signalling at the PM,  
1031 and LYM2 accumulates at plasmodesmata where it forms a higher order complex. This  
1032 complex recruits LYK4 and CPK6 (brown) which phosphorylates RBOHD (yellow) and  
1033 induces callose (blue) synthesis via a glucan-synthase like enzyme (GSL, purple) to close PD.

1034

1035 **Table 1.** FRET efficiencies of LYK4-GFP in the presence and absence of the acceptor-RFP.  
 1036 The mean of FRET efficiency is expressed in percentage (%). PM, plasma membrane; PD,  
 1037 plasmodesmata; SE, standard error.

| <b>Localisation</b> | <b>Donor</b> | <b>Acceptor</b> | <b>Treatment</b> | <b>Additional Construct</b> | <b>FRET efficiency (%)</b> | <b>SE</b> |
|---------------------|--------------|-----------------|------------------|-----------------------------|----------------------------|-----------|
| PM                  | LYK4-GFP     | –               | –                | –                           | –                          | –         |
| PM                  | LYK4-GFP     | LYK5-RFP        | –                | –                           | 10.65                      | 0.02      |
| PM                  | LYK4-GFP     | BRI1-RFP        | –                | –                           | 3.76                       | 0.43      |
| PM                  | LYK4-GFP     | –               | chitin           | –                           | 2.05                       | 0.46      |
| PM                  | LYK4-GFP     | LYK5-RFP        | chitin           | –                           | 7.20                       | 0.53      |
| PM                  | LYK4-GFP     | BRI1-RFP        | chitin           | –                           | 2.74                       | 0.56      |
| PD                  | LYK4-GFP     | –               | –                | Citrine-LYM2                | –                          | –         |
| PD                  | LYK4-GFP     | LYK5-RFP        | –                | Citrine-LYM2                | 2.50                       | 0.55      |
| PM                  | LYK4-GFP     | –               | –                | Citrine-LYM2                | –                          | –         |
| PM                  | LYK4-GFP     | LYK5-RFP        | –                | Citrine-LYM2                | 4.69                       | 0.55      |

1038

1039

1040

1041 **Table 2.** Primer sequences used in RT-PCR analysis of *LYSM-RKs*.

| Gene          | Primer Sequences (5'-3')                                             |
|---------------|----------------------------------------------------------------------|
| <i>ACTIN2</i> | F: ATGGCTGAGGCTGATGATATTCAAC<br>R: CCAGGAATCGTTCACAGAAAATGTTTC       |
| <i>CERK1</i>  | F: ATGAAGCTAAAGATTTCTCTAATCGCTCCG<br>R: GTCAGTCTTATGTCCGGCCGGTAG     |
| <i>LYK2</i>   | F: ATGGCTGTTTCAGTTAGTAAGC<br>R: CCTTTGGTAAAGAAGAGTAGTATAATAG         |
| <i>LYK3</i>   | F: GCAAAGAGTGGTAGTCATGTGCC<br>R: GTGGTCTAGTCCAAGGAAGATAA             |
| <i>LYK4</i>   | F: CCACAATCGGTTTCTCCTCCTCCATTGTC<br>R: CTACGCAGAACTGGGAAGAATCGTCGTAC |
| <i>LYK5</i>   | F: TTCTGGTCTCAACCACCGTAC<br>R: CATCCGTCTCTCAGGTTTCTG                 |

1042

1043

1044 **Supplementary Data**

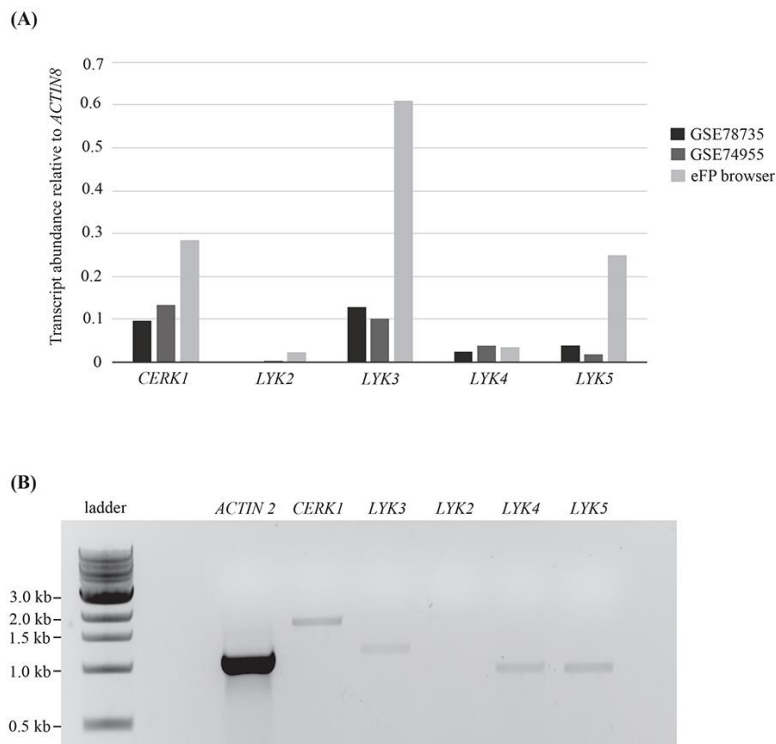

Figure S1

1045

1046 **Figure S1. *LYK2* is not detected in mature leaves.** (A) Publically available gene expression  
1047 data from RNAseq (GSE78735 Hillmer *et al.*, 2017; GSE74955, Yamada *et al.*, 2016) and  
1048 microarray experiments (eFP browser, Winter *et al.*, 2007) showing mRNA abundance of  
1049 *LYK* family members relative to *ACTIN8*. The experimental data sets are indicated. (B) Semi-  
1050 quantitative transcript abundance of *LYSM-RKs* in 5–6-week-old Arabidopsis leaf tissue.  
1051 Transcript abundance was detected by RT-PCR and *ACTIN2* was used as an internal control.  
1052 The primers used for RT-PCR are listed in the supplemental data (Table 2). RT-PCR reaction  
1053 with these primers give the following sizes: *ACTIN2*, 1131bp; *CERK1*, 1854bp; *LYK2*,  
1054 1960bp; *LYK3*, 1275bp; *LYK4*, 1083bp; *LYK5*, 1082bp.

1055



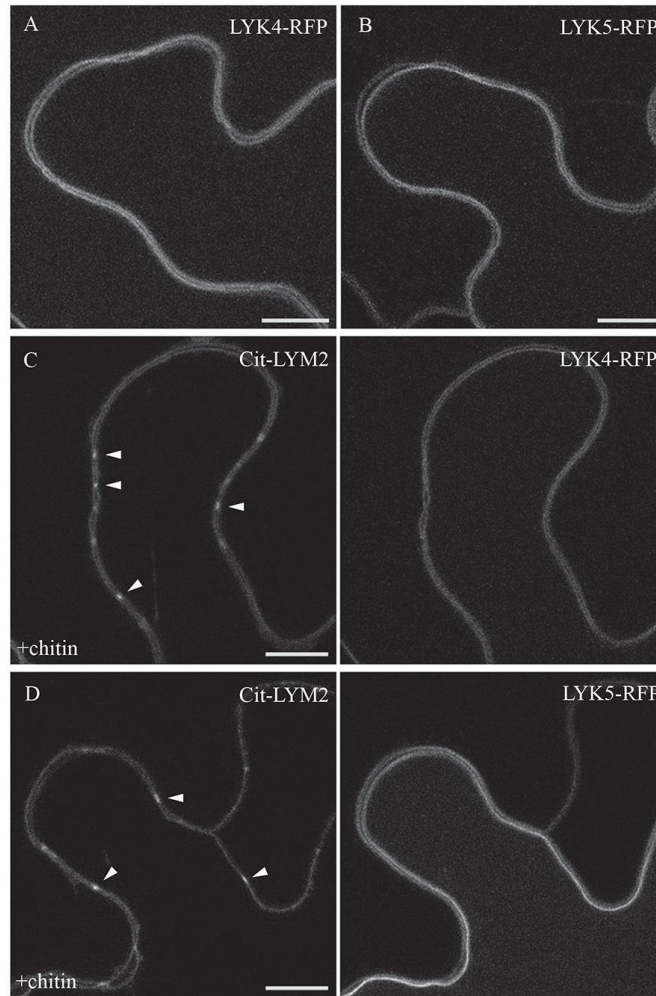

Figure S2

1056

1057 **Figure S2. LYK4 and LYK5 localise to the PM.** LYK4-RFP (A) and LYK5-RFP (B)  
1058 localise evenly across plasma membrane when transiently expressed in *N.benthamiana*. (C)  
1059 and (D) show localisation of LYK4-RFP and LYK5-RFP respectively in tissue that is co-  
1060 expressing Citrine-LYM2 (Cit-LYM2) and has been treated with chitin for 30 min.  
1061 Arrowheads identify Citrine-LYM2 marked plasmodesmata. Scale bars are 10 μm.

1062

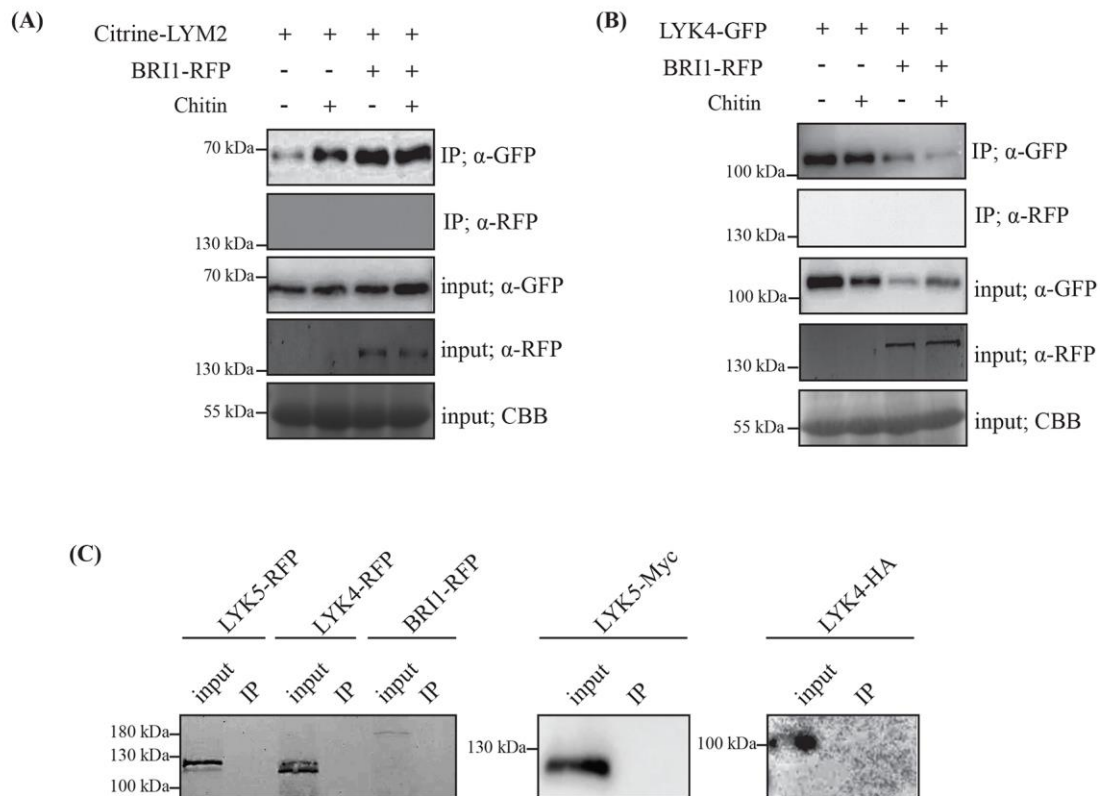

Figure S3

1063

1064 **Figure S3. Negative controls for immunoprecipitation experiments.** (A) and (B) Western  
 1065 blot analysis of immunoprecipitated protein extracts from *N. benthamiana* tissue expressing  
 1066 BRI1-RFP and either Citrine-LYM2 (A) or LYK4-GFP. (B) Citrine-LYM2 and LYK4-GFP  
 1067 were immunoprecipitated using GFP-trap beads and Western blots were probed with  $\alpha$ -RFP  
 1068 to detect BRI1-RFP. Coomassie brilliant blue stained membranes serve as a loading control  
 1069 (CBB). Experiments were repeated three times with similar results. (C) LYK5-RFP, LYK4-  
 1070 RFP, BRI1-RFP, LYK5-Myc, LYK4-HA were immunoprecipitation with GFP-trap beads.  
 1071 Western blots of the input and immunoprecipitated (IP) samples were probed with antibodies  
 1072  $\alpha$ -RFP,  $\alpha$ -Myc and  $\alpha$ -HA.

1073

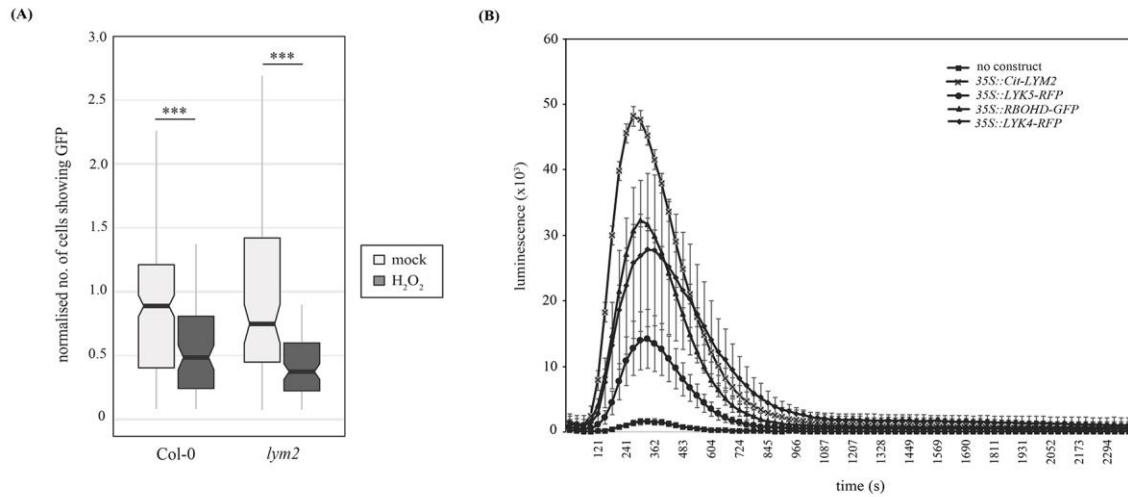

Figure S4

1074

1075 **Figure S4. LYM2 acts upstream of ROS signalling in plasmodesmata closure**

1076 (A) Microprojectile bombardment into leaf tissue shows that H<sub>2</sub>O<sub>2</sub> induces a reduction in  
1077 GFP movement between cells in both Col-0 and *lym2-1* leaves. The number of cells showing  
1078 GFP has been normalised to the mean of the mock data within genotypes. This data is  
1079 summarised in box-plots in which the line within the box marks the median, the box signifies  
1080 the upper and lower quartiles, the minimum and maximum within 1.5 × interquartile range.  
1081 Data was analysed by a Students' t-test, or by a Mann-Whitney U-test for non-normal data (n  
1082 ≥ 93, \*\*\*p-value < 0.001). (B) Total accumulation of ROS in chitin-treated *N. benthamiana*  
1083 leaf discs transiently expressing Citrine-LYM2, LYK4-RFP, LYK5-RFP, or RBOHD-GFP.  
1084 Mean RLU are plotted over time (s). Error bars are SEM.

1085

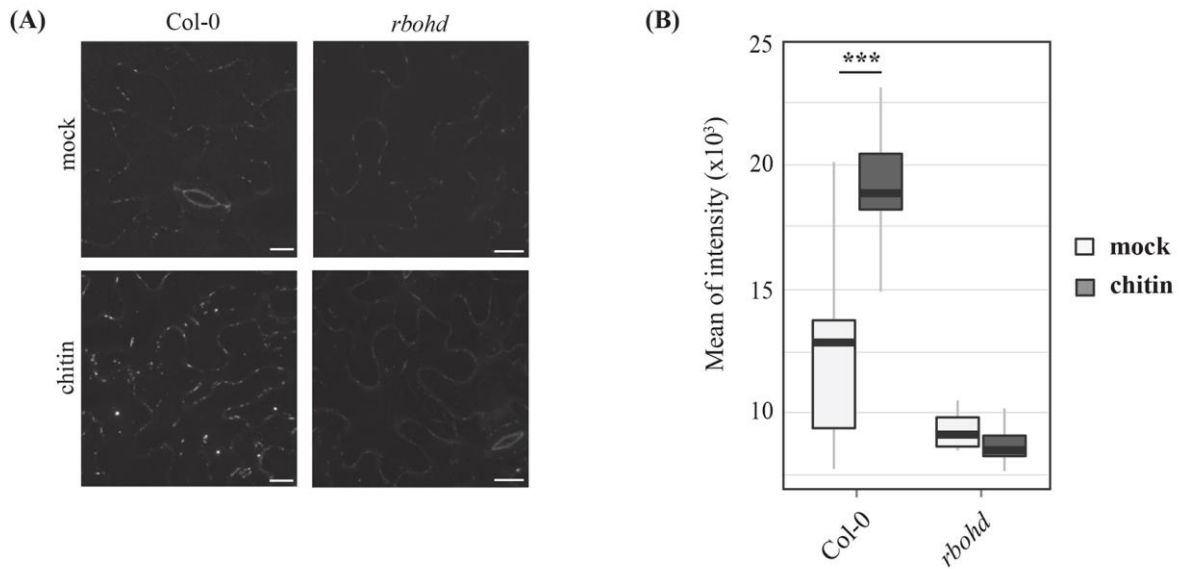

Figure S5

1086

1087 **Figure S5. *rbohD* mutants do not deposit callose at plasmodesmata in response to chitin**

1088 (A) Confocal images of aniline blue stained plasmodesmal callose deposits in leaf tissue of  
1089 5–6-week-old leaves of Col-0 and *rbohD* mutant plants. Images were acquired 30 min post-  
1090 infiltration with water or chitin. Scale bars are 15  $\mu$ m. Images for Col-0 are as presented in  
1091 Fig. 1B. (B) Quantification of plasmodesmata-associated fluorescence of aniline blue stained  
1092 callose using automated image analysis. In contrast to Col-0, the *rbohD* mutant does not show  
1093 increased aniline blue fluorescence at plasmodesmata in response to chitin. This correlates  
1094 with the flux phenotype and identifies that chitin-triggered plasmodesmata closure is caused  
1095 by callose deposition at plasmodesmata. The fluorescence intensity is summarised in box-  
1096 plots in which the line within the box marks the median, the box signifies the upper and lower  
1097 quartiles, the minimum and maximum within  $1.5 \times$  interquartile range. Data was analysed by  
1098 pairwise Students' t-test comparing mock to chitin treated tissue within genotypes ( $n \geq 31$ ,  
1099 \*\*\*p-value < 0.001). Data for Col-0 is as presented in Fig. 1B.

1100

1101

1102

1103 **Table S1.** n-values for experiments in which different samples had different numbers of  
1104 replicates.

1105

| <b>Experiment</b>        | <b>n</b> | <b>Figure</b> |
|--------------------------|----------|---------------|
| <b>Bombardment</b>       |          |               |
| col0-control             | 303      | 1A            |
| col0-chitin              | 301      | 1A            |
| lym2-control             | 101      | 1A            |
| lym2-chitin              | 133      | 1A            |
| lyk3-control             | 314      | 1A            |
| lyk3-chitin              | 306      | 1A            |
| lyk4-control             | 142      | 1A            |
| lyk4-chitin              | 84       | 1A            |
| lyk5-control             | 123      | 1A            |
| lyk5-chitin              | 84       | 1A            |
| rboh1-control            | 212      | 5A            |
| rboh1-chitin             | 121      | 5A            |
| bik1-control             | 93       | 5A            |
| bik1-chitin              | 89       | 5A            |
| S343A/S347A-control      | 114      | 5A            |
| S343A/S347A-chitin       | 120      | 5A            |
| S39A/S339A/S343A-control | 111      | 5A            |
| S39A/S339A/S343A-chitin  | 211      | 5A            |
| S163A-control            | 225      | 5A            |
| S163A-chitin             | 225      | 5A            |
| S133A-control            | 227      | 5A            |
| S133A-chitin             | 121      | 5A            |
| cpk6-1-control           | 104      | 5A            |
| cpk6-1-chitin            | 274      | 5A            |
| cpk6-2-control           | 158      | 5A            |
| cpk6-2-chitin            | 108      | 5A            |
| col0-control             | 230      | S4A           |

|                         |     |     |
|-------------------------|-----|-----|
| col0-H2O2               | 85  | S4A |
| lym2-control            | 101 | S4A |
| lym2-H2O2               | 91  | S4A |
|                         |     |     |
| <b>Callose Staining</b> |     |     |
| col0-control            | 59  | 1B  |
| col0-chitin             | 51  | 1B  |
| lym2-control            | 40  | 1B  |
| lym2-chitin             | 43  | 1B  |
| lyk4-control            | 48  | 1B  |
| lyk4-chitin             | 31  | 1B  |
| lyk5-control            | 49  | 1B  |
| lyk5-chitin             | 48  | 1B  |
| cerk1-control           | 49  | 1B  |
| cerk1-chitin            | 54  | 1B  |
| rboh1-control           | 37  | S5B |
| rboh1-chitin            | 45  | S5B |
|                         |     |     |
| <b>PD Index</b>         |     |     |
| control                 | 31  | 4B  |
| chitin                  | 31  | 4B  |
|                         |     |     |
| <b>Anisotropy</b>       |     |     |
| GFP                     | 11  | 4C  |
| Cit-LYM2 PM             | 21  | 4C  |
| Cit-LYM2 PD             | 21  | 4C  |
|                         |     |     |
| <b>FRAP</b>             |     |     |
| Cit-LYM2 chitin PD      | 43  | 4D  |
| Cit-LYM2 chitin PM      | 45  | 4D  |
| Cit-LYM2 water PD       | 46  | 4D  |
| Cit-LYM2 water PM       | 52  | 4D  |
| LYK4-RFP chitin PM      | 52  | 4D  |

|                                   |     |    |
|-----------------------------------|-----|----|
| LYK4-RFP water PM                 | 60  | 4D |
| LYK5-RFP chitin PM                | 50  | 4D |
| LYK5-RFP water PM                 | 50  | 4D |
|                                   |     |    |
| <b>FLIM</b>                       |     |    |
| LYK4-GFP                          | 110 | 3B |
| LYK4-GFP+LYK5-RFP                 | 71  | 3B |
| LYK4-GFP+ BRI1-RFP                | 39  | 3B |
| LYK4-GFP+ CHITIN                  | 29  | 3B |
| LYK4-GFP+ LYK5-RFP+ CHITIN        | 40  | 3B |
| LYK4-GFP+ BRI1-RFP+ CHITIN        | 19  | 3B |
| LYK4-GFP + Cit-LYM2 PM            | 44  | 3C |
| LYK4-GFP + LYK5-RFP + Cit-LYM2 PM | 38  | 3C |
| LYK4-GFP + Cit-LYM2 PD            | 27  | 3C |
| LYK4-GFP + LYK5-RFP + Cit-LYM2 PD | 33  | 3C |

1106

1107
